# Supplementary material
Source: publisher figshare collection journal article supplement (https://acs.figshare.com/ndownloader/files/7038089)

## Supporting Information

### **Photoredox-Induced Functionalization of Alkenes for the Synthesis of Substituted Imidazolines and Oxazolidines**

Jian-Qiang Chen, Wan-Lei Yu, Yun-Long Wei, Teng-Hui Li and Peng-Fei Xu\*

#### **Contents**

|                                                  |    |
|--------------------------------------------------|----|
| 1. Devices for the photocatalytic reactions..... | S2 |
| 2. Determination of the configuration .....      | S3 |
| 3. X-ray data for compound <b>4i</b> .....       | S5 |
| 4. NMR spectra of compounds.....                 | S6 |

## 1. Devices for the photocatalytic reactions

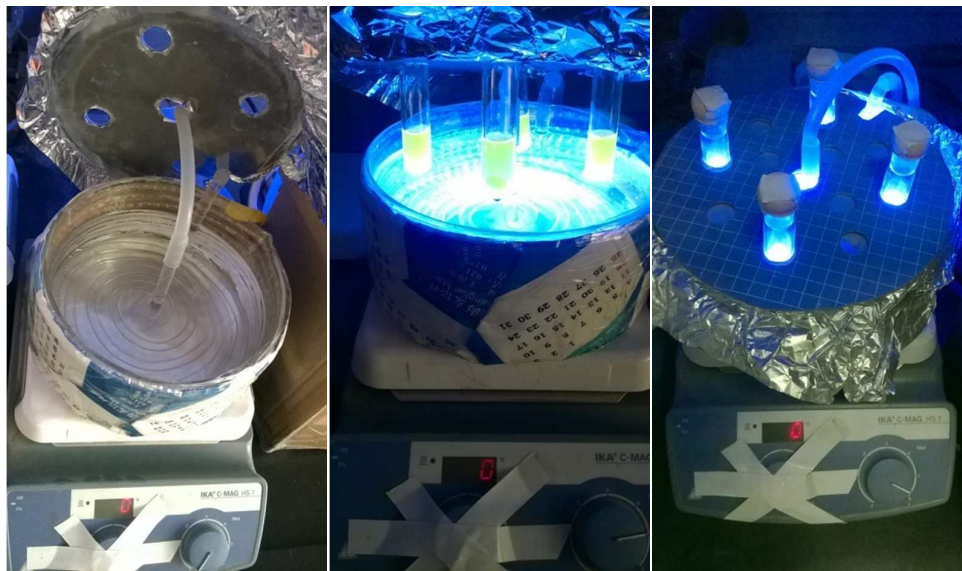

**Figure 1.** Devices for the photocatalytic reactions.

## 2. Determination of the configuration

nOe spectrum of compound **31** (CDCl<sub>3</sub>, 600MHz)

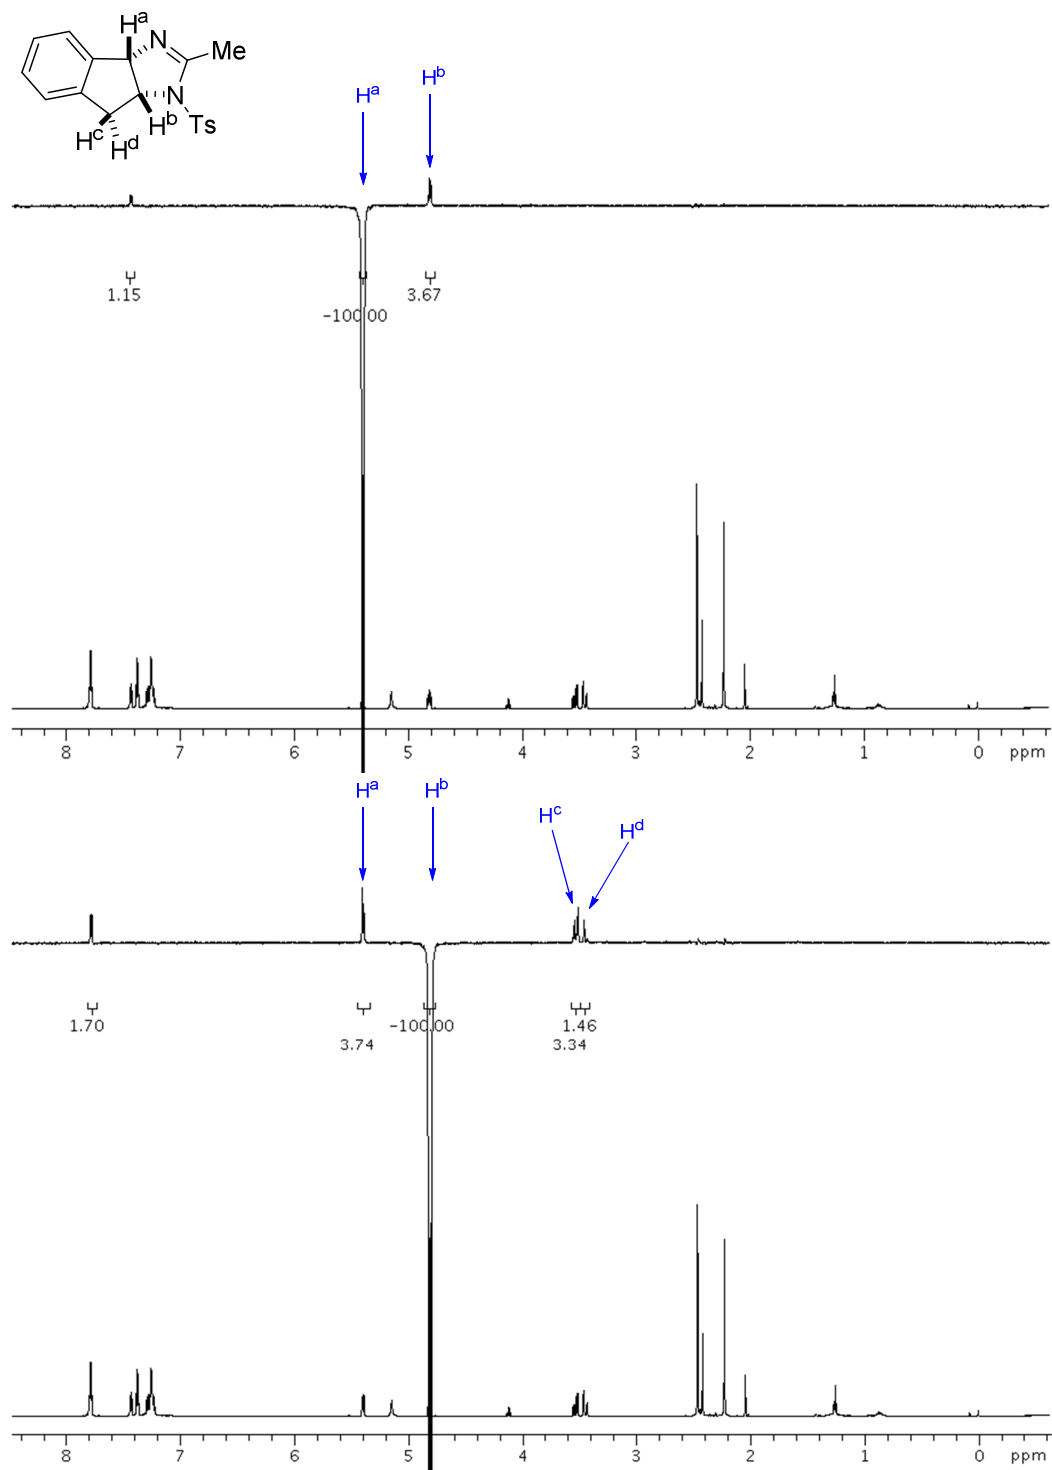

nOe spectrum of compound **4h** (CDCl<sub>3</sub>, 600MHz)

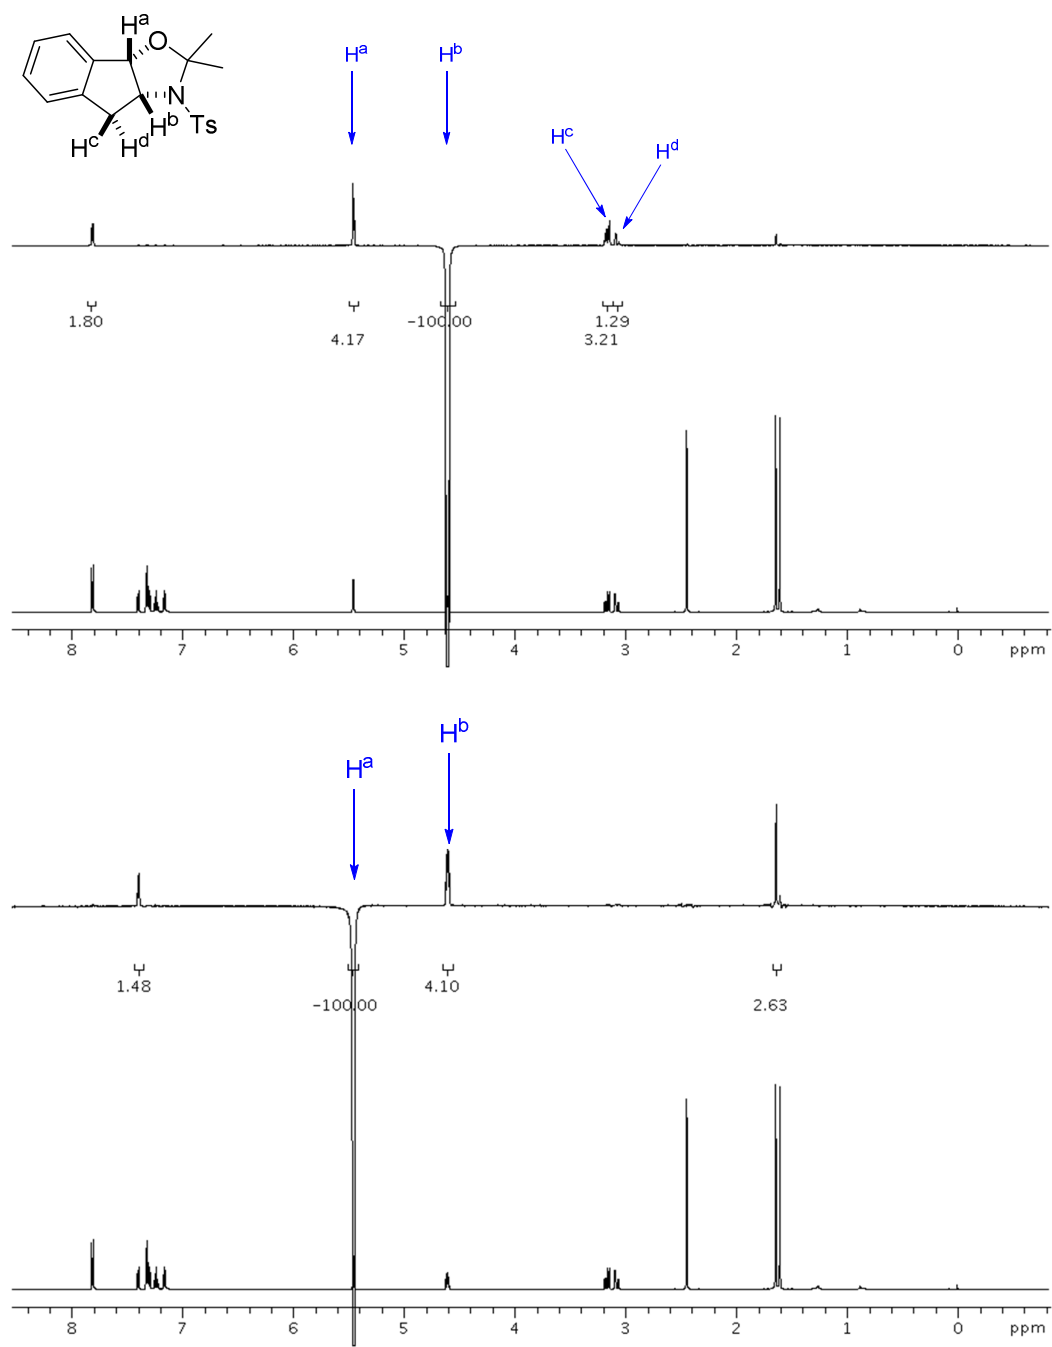

### 3. X-ray data for compound **4i** (CCDC 1517534)

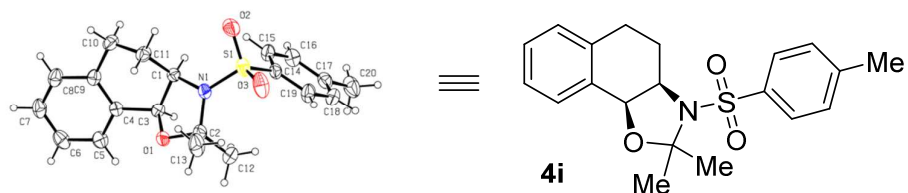

Bond precision: C-C = 0.0038 Å Wavelength=0.71073

Cell: a=35.044(2) b=8.2840(6) c=12.6899(7)  
 alpha=90 beta=98.376(5) gamma=90

Temperature: 293 K

|                        | Calculated                                         | Reported                                           |
|------------------------|----------------------------------------------------|----------------------------------------------------|
| Volume                 | 3644.6(4)                                          | 3644.7(4)                                          |
| Space group            | C 2/c                                              | C 1 2/c 1                                          |
| Hall group             | -C 2yc                                             | -C 2yc                                             |
| Moiety formula         | C <sub>20</sub> H <sub>23</sub> N O <sub>3</sub> S | C <sub>20</sub> H <sub>23</sub> N O <sub>3</sub> S |
| Sum formula            | C <sub>20</sub> H <sub>23</sub> N O <sub>3</sub> S | C <sub>20</sub> H <sub>23</sub> N O <sub>3</sub> S |
| Mr                     | 357.45                                             | 357.45                                             |
| Dx, g cm <sup>-3</sup> | 1.303                                              | 1.303                                              |
| Z                      | 8                                                  | 8                                                  |
| Mu (mm <sup>-1</sup> ) | 0.196                                              | 0.196                                              |
| F <sub>000</sub>       | 1520.0                                             | 1520.0                                             |
| F <sub>000</sub> '     | 1521.63                                            |                                                    |
| h,k,lmax               | 43,10,15                                           | 43,10,15                                           |
| Nref                   | 3595                                               | 3583                                               |
| Tmin,Tmax              | 0.956,0.981                                        | 0.640,1.000                                        |
| Tmin'                  | 0.954                                              |                                                    |

Correction method= # Reported T Limits: Tmin=0.640

Tmax=1.000 AbsCorr = MULTI-SCAN

Data completeness= 0.997 Theta(max)= 26.020

R(reflections)= 0.0524( 2327) wR2(reflections)= 0.1384( 3583)

S = 1.039 Npar= 229

Displacement ellipsoids are drawn at 30% probability level.

#### 4. NMR spectra of compounds

##### 2-methyl-4-phenyl-1-tosyl-4,5-dihydro-1H-imidazole (3a)

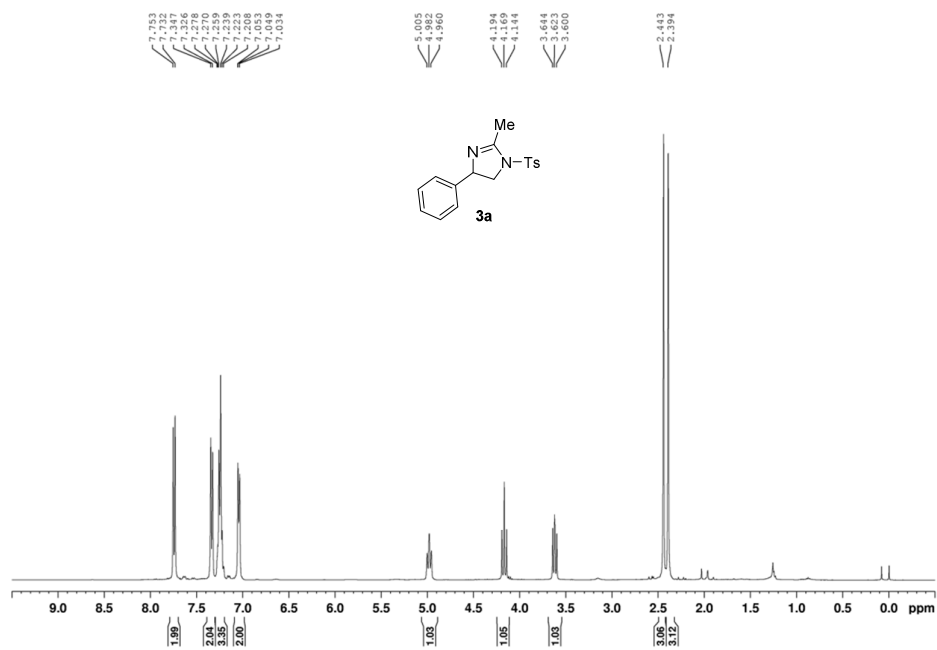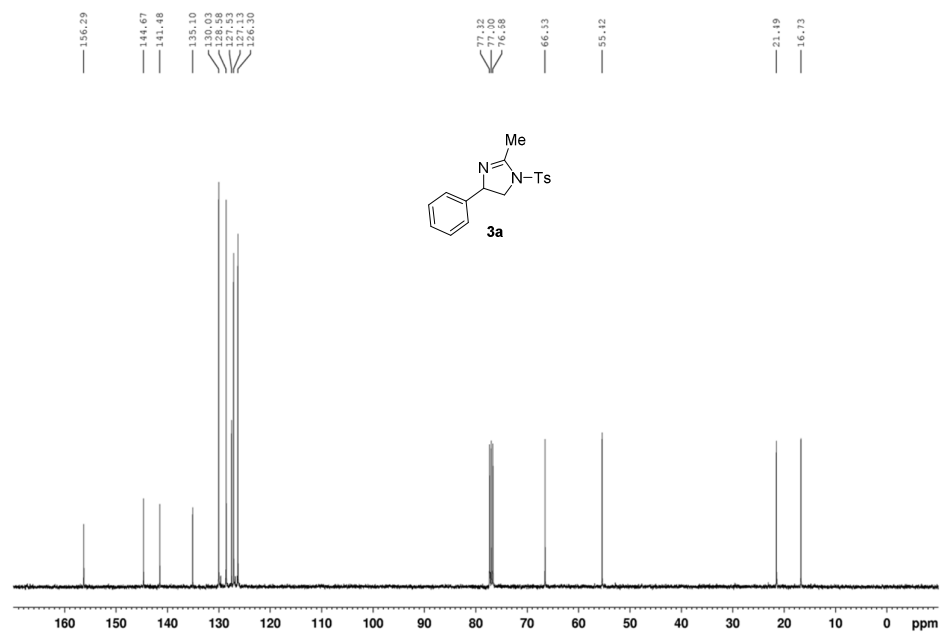

**2-methyl-4-phenyl-1-(phenylsulfonyl)-4,5-dihydro-1H-imidazole (3b)**

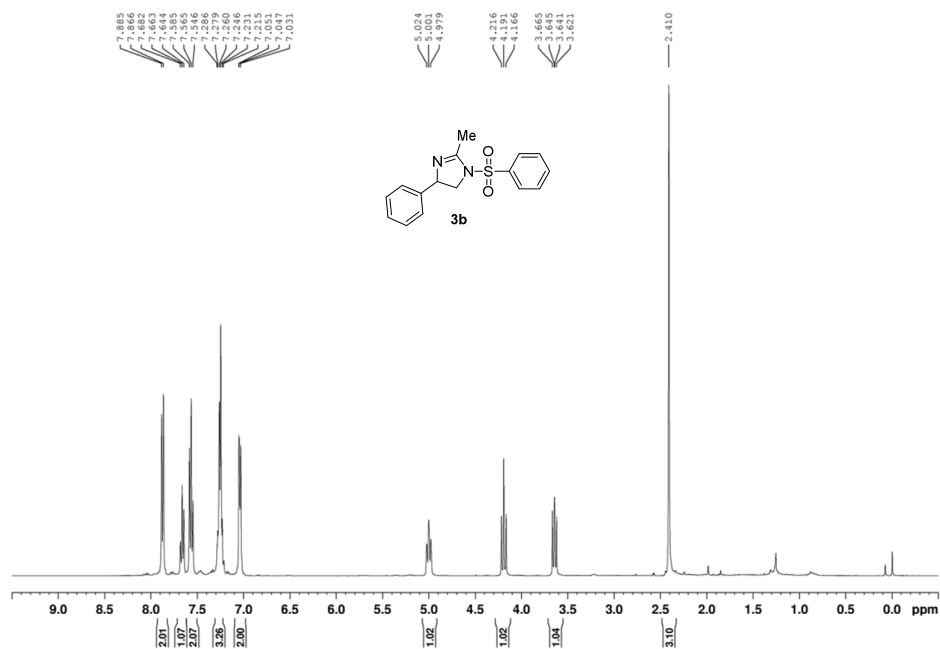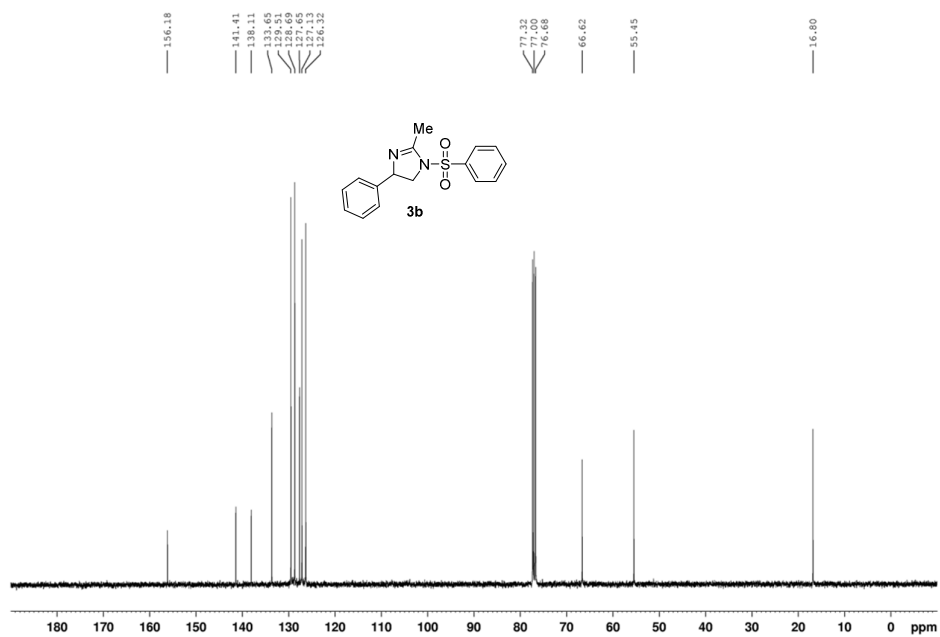

**4-(4-fluorophenyl)-2-methyl-1-tosyl-4,5-dihydro-1H-imidazole (3c)**

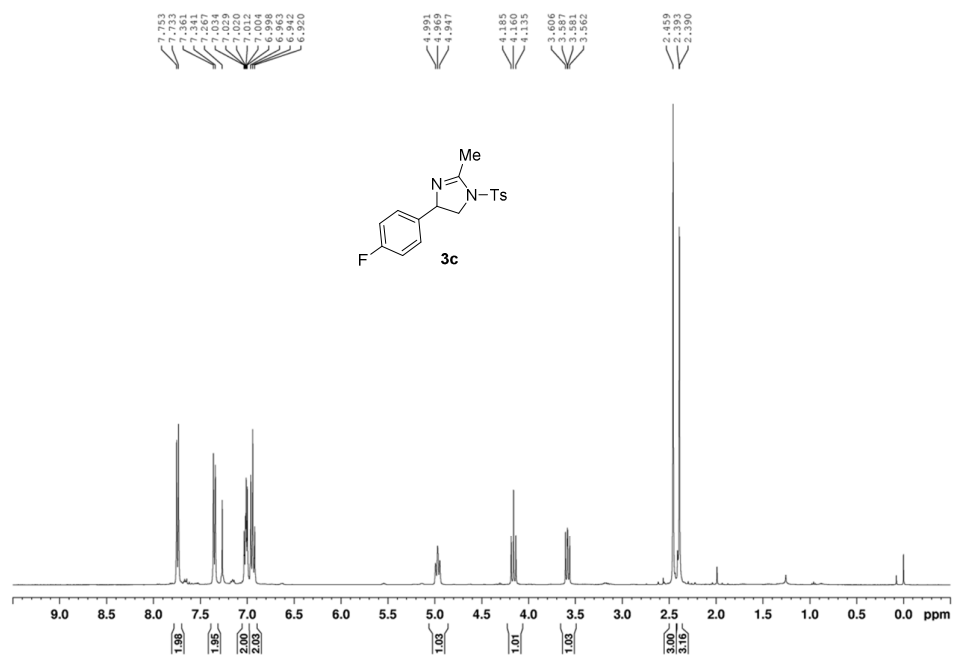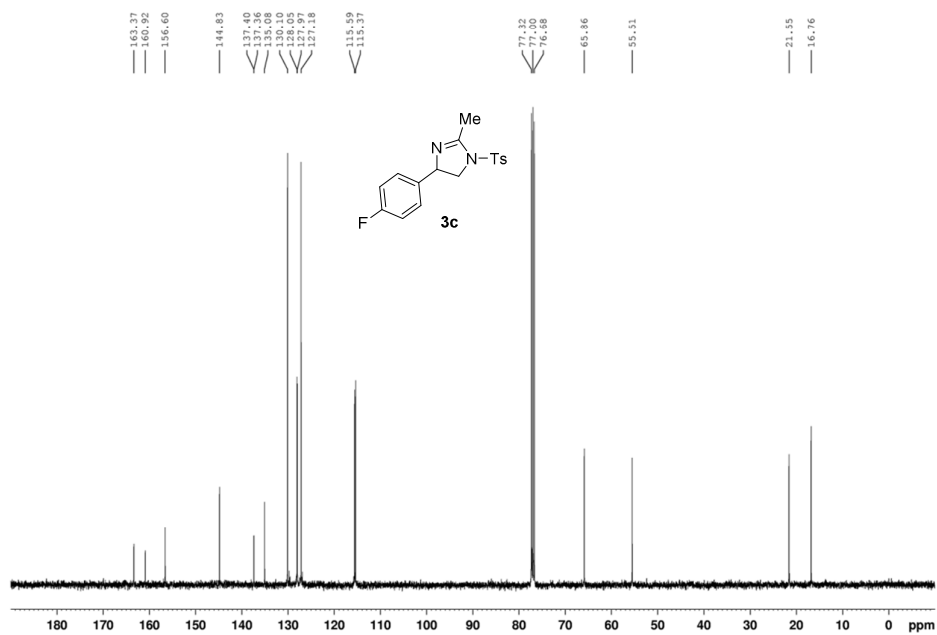



**4-(4-chlorophenyl)-2-methyl-1-tosyl-4,5-dihydro-1H-imidazole (3d)**

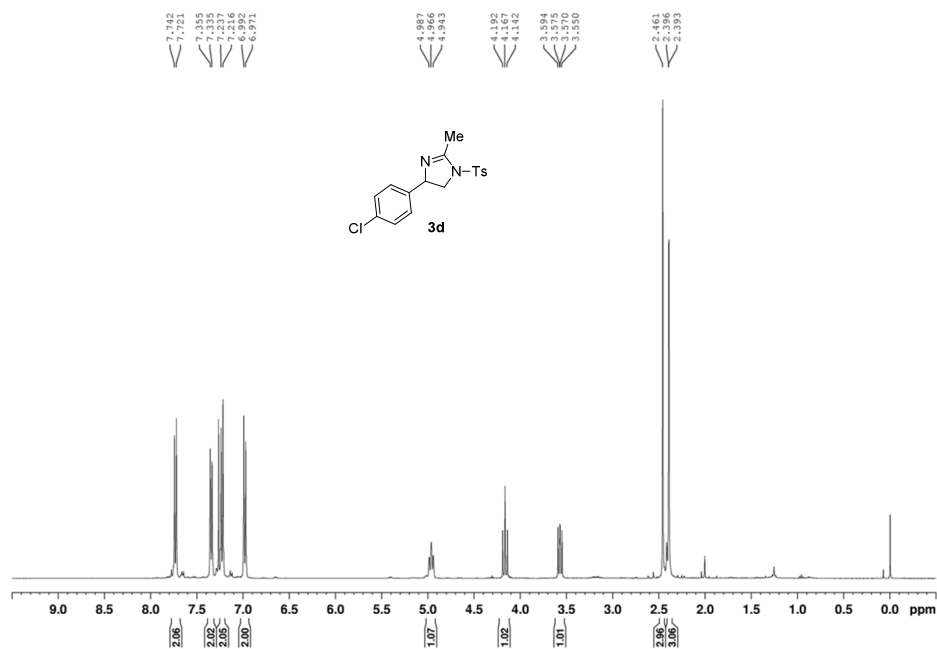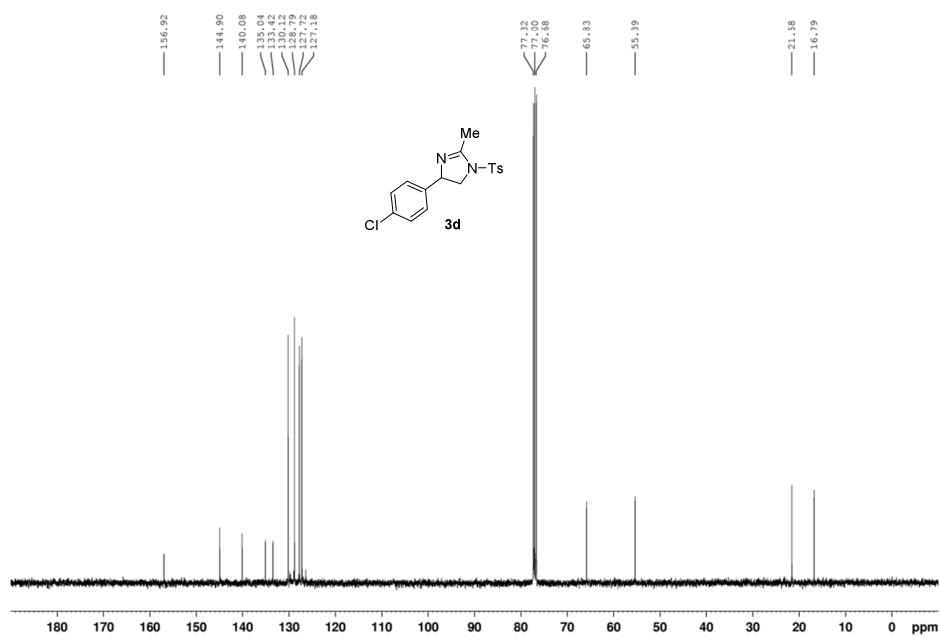

**4-(4-bromophenyl)-2-methyl-1-tosyl-4,5-dihydro-1H-imidazole (3e)**

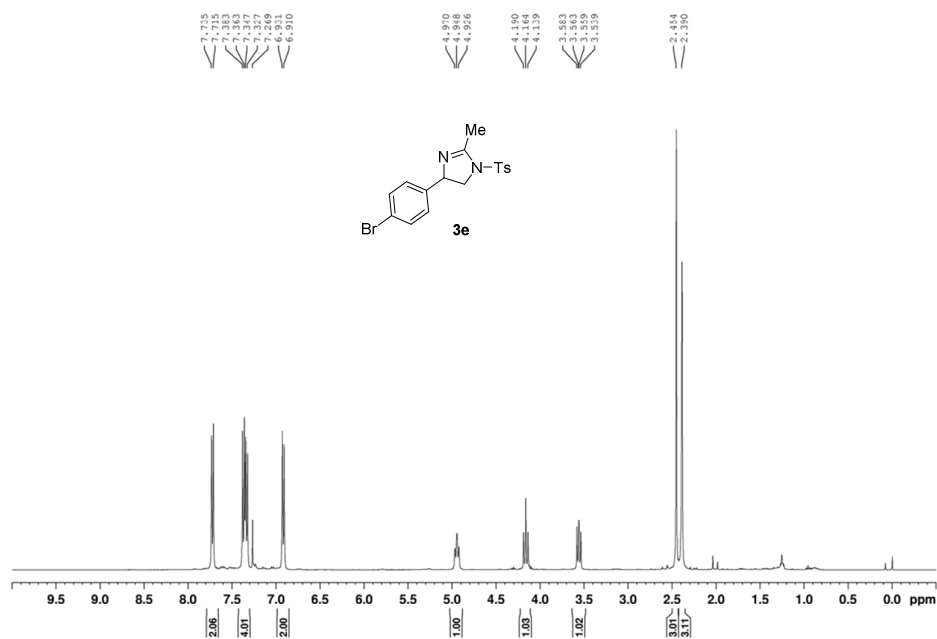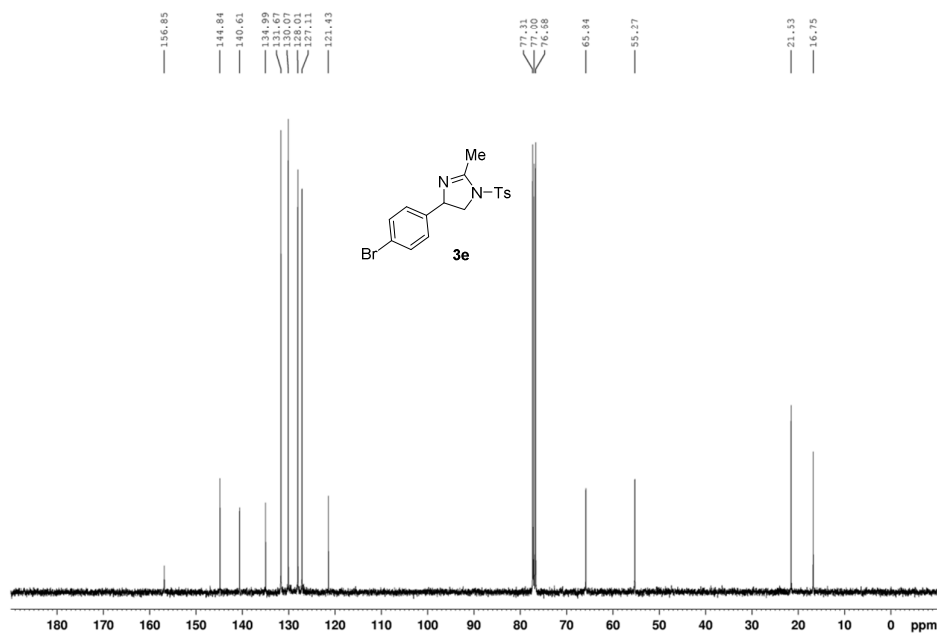

**4-(3-chlorophenyl)-2-methyl-1-tosyl-4,5-dihydro-1H-imidazole (3f)**

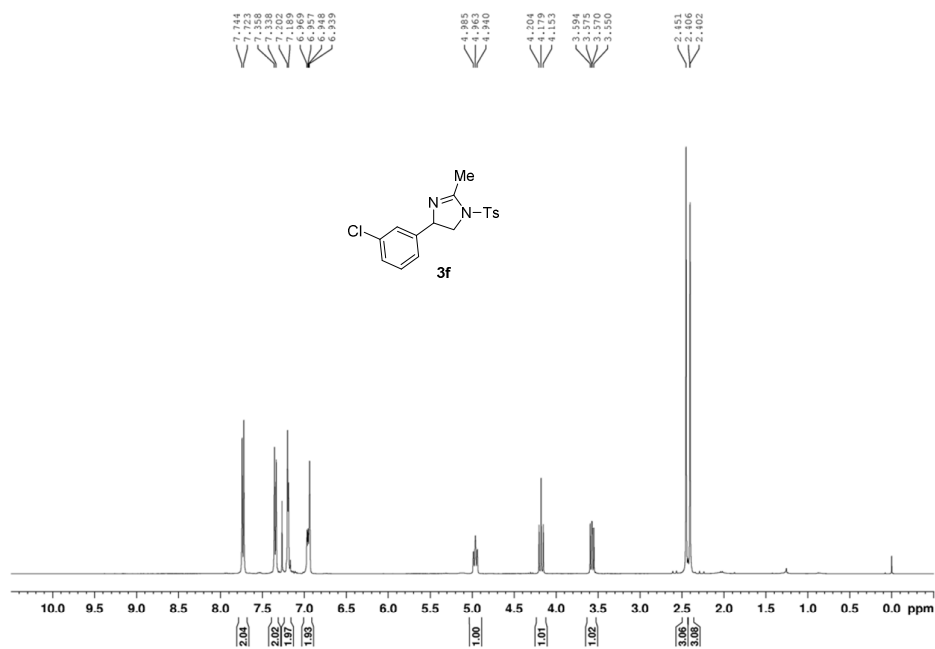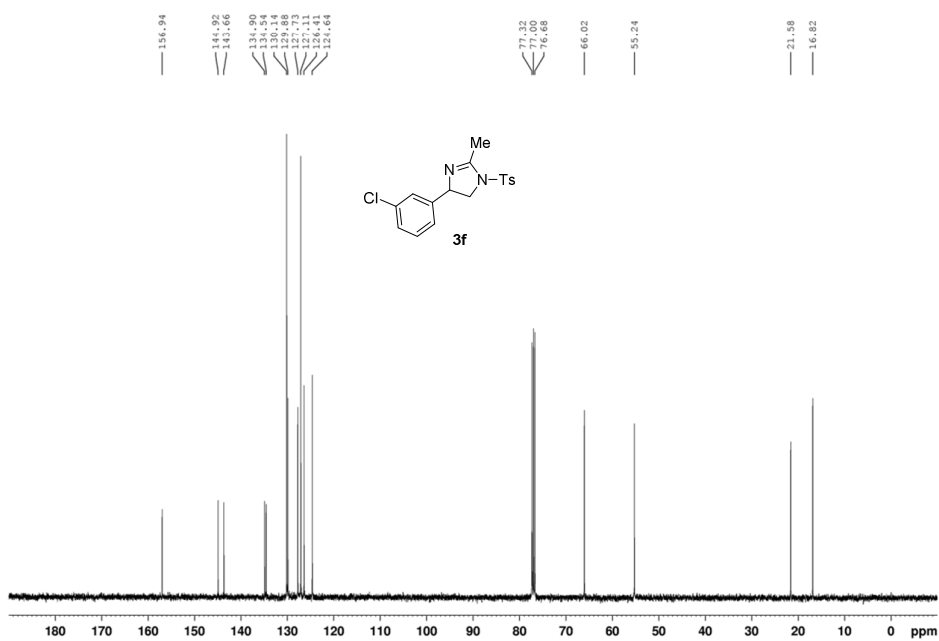

# 4-(2-chlorophenyl)-2-methyl-1-tosyl-4,5-dihydro-1H-imidazole (3g)

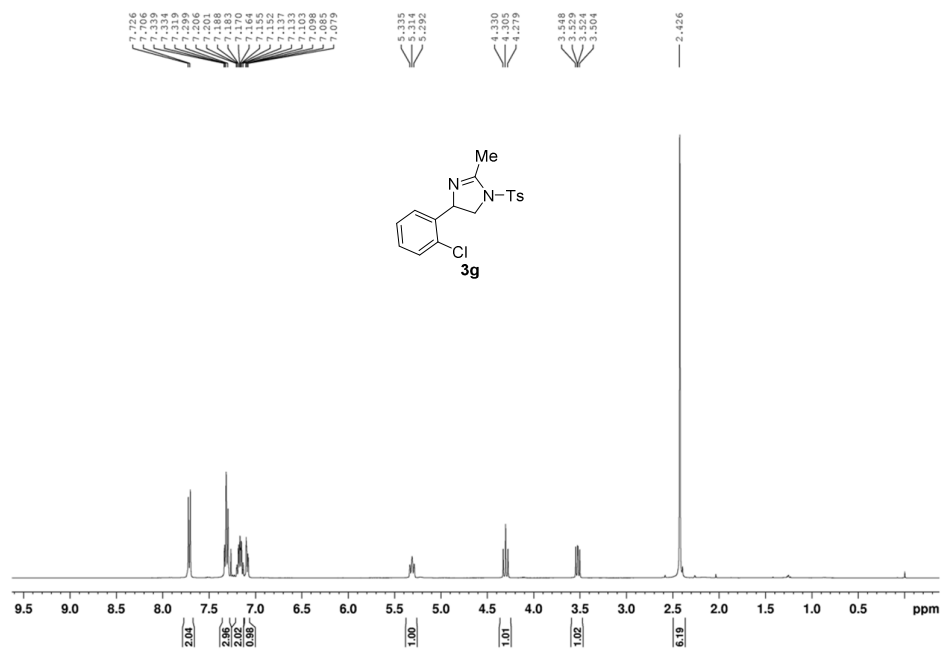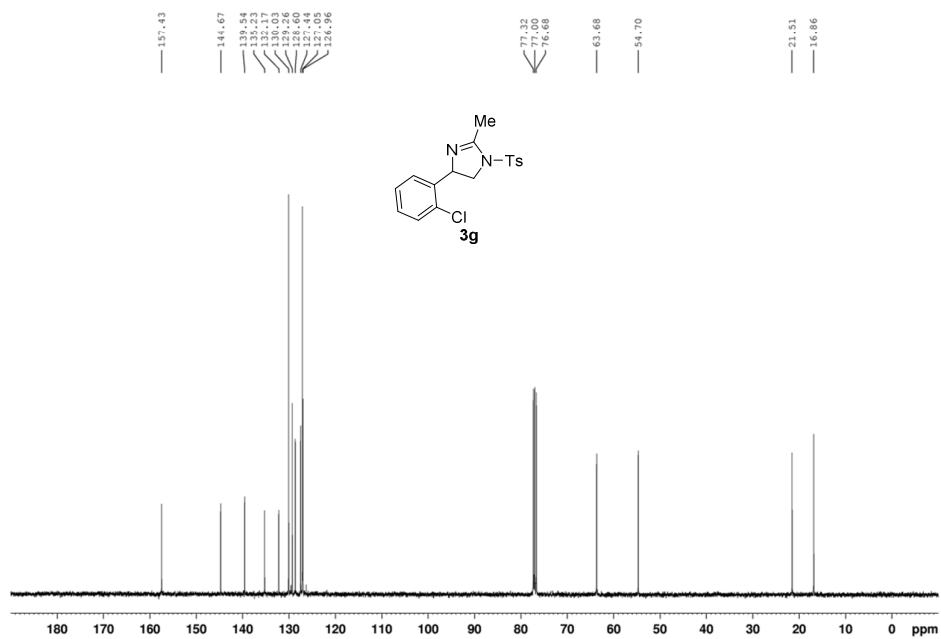

**2-methyl-4-(p-tolyl)-1-tosyl-4,5-dihydro-1H-imidazole (3h)**

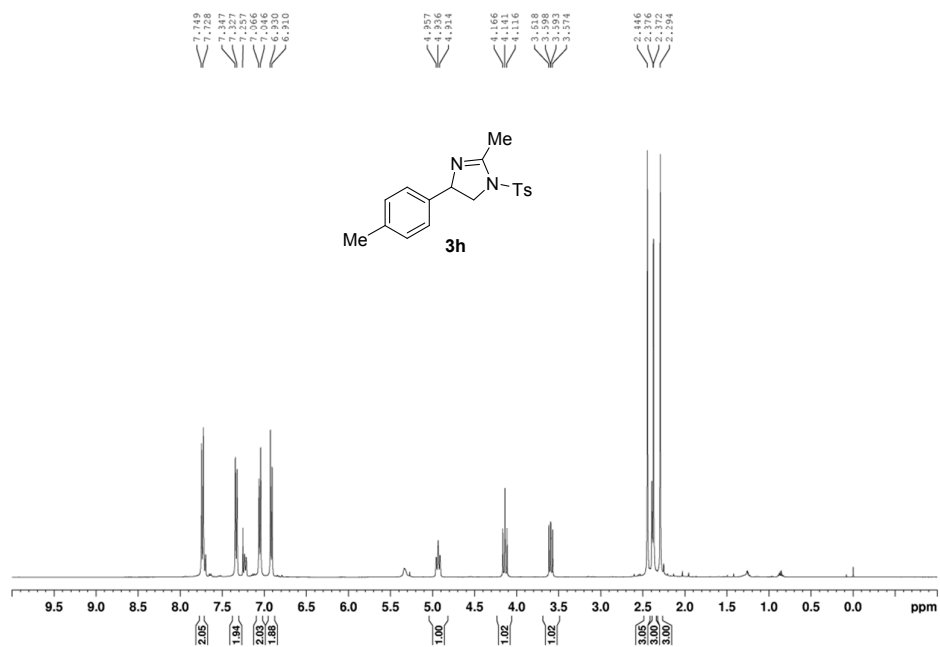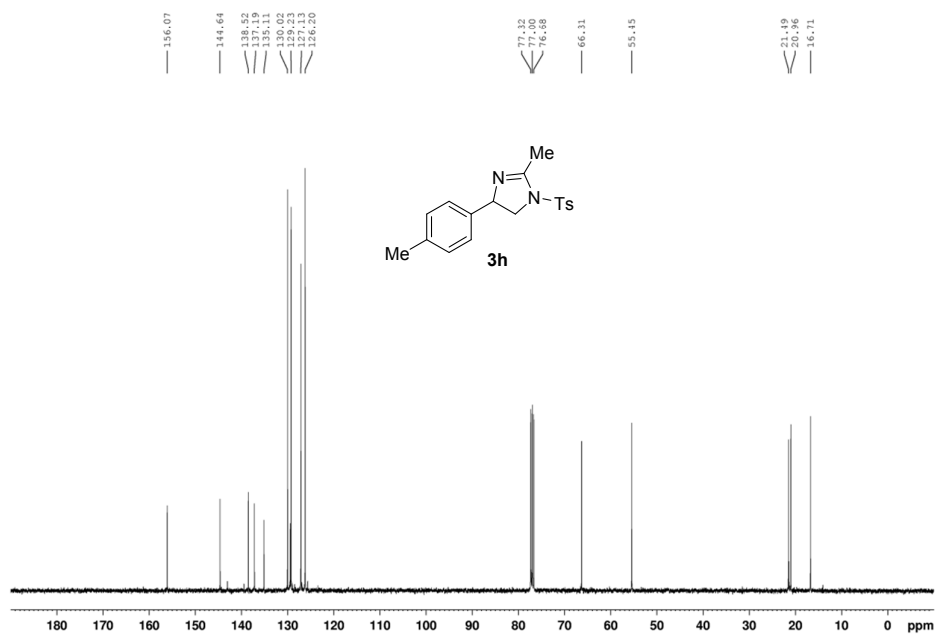

**2-methyl-4-(m-tolyl)-1-tosyl-4,5-dihydro-1H-imidazole (3i)**

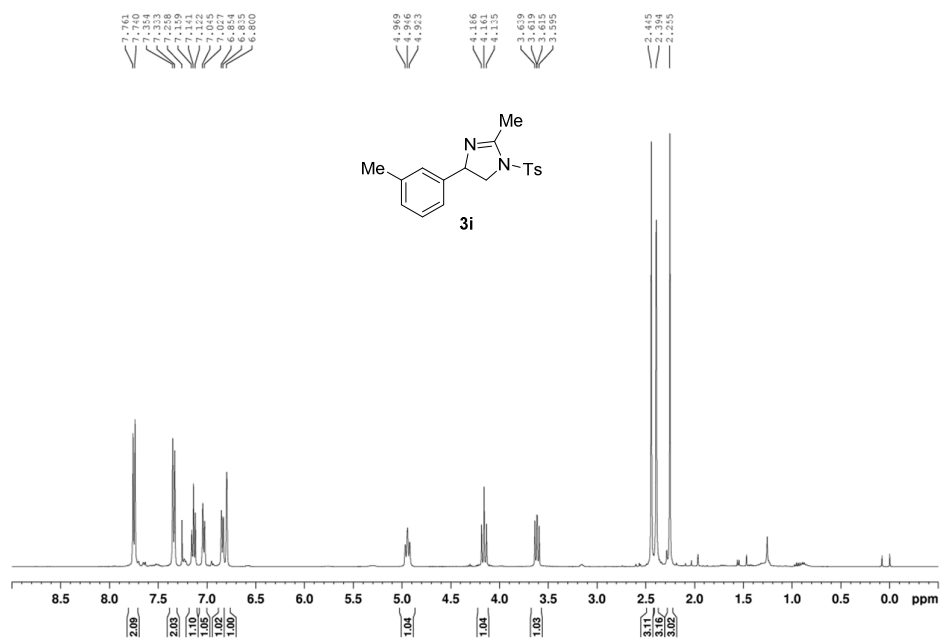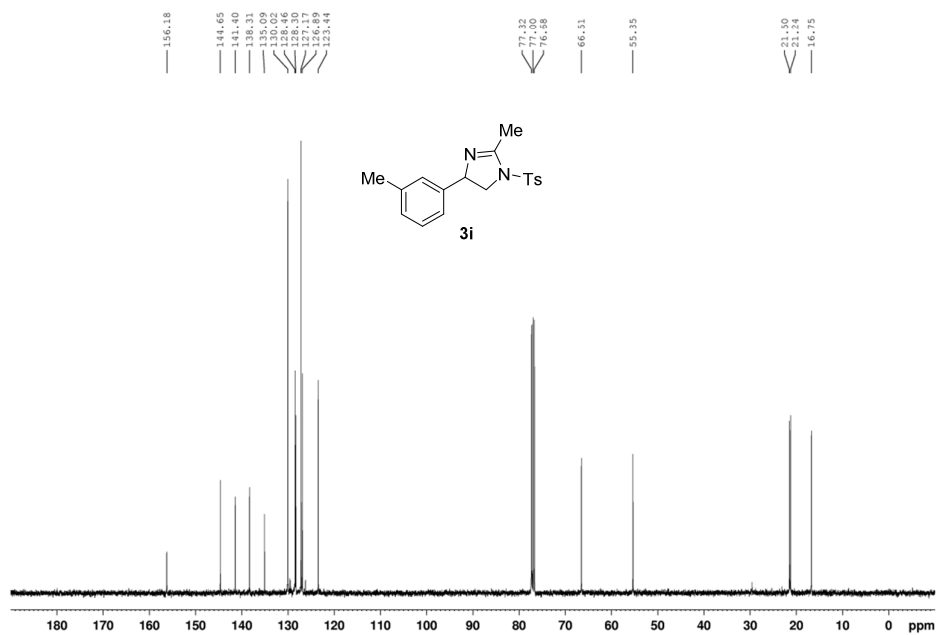

**2-methyl-4-(o-tolyl)-1-tosyl-4,5-dihydro-1H-imidazole (3j)**

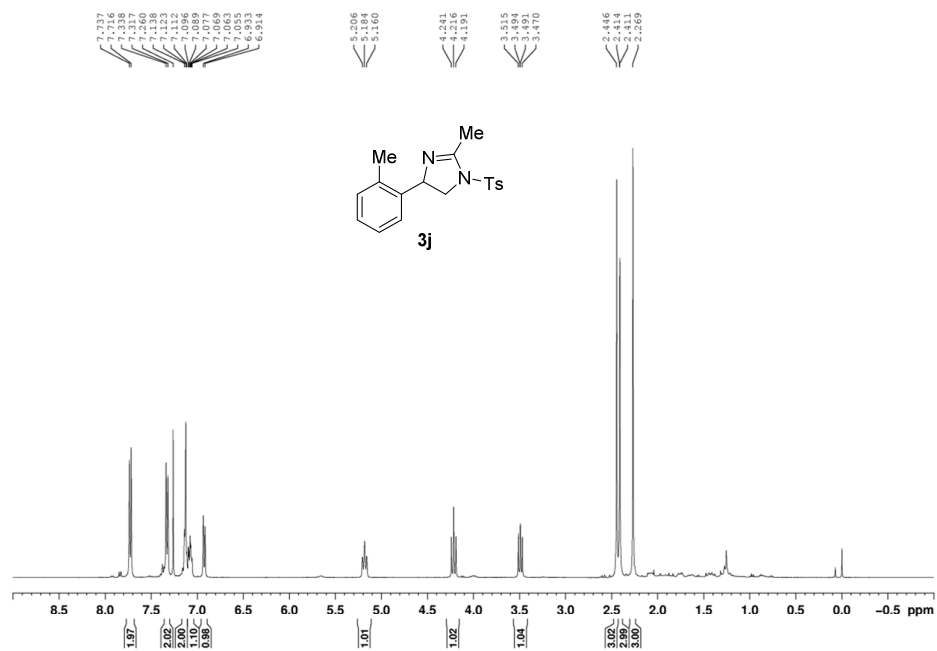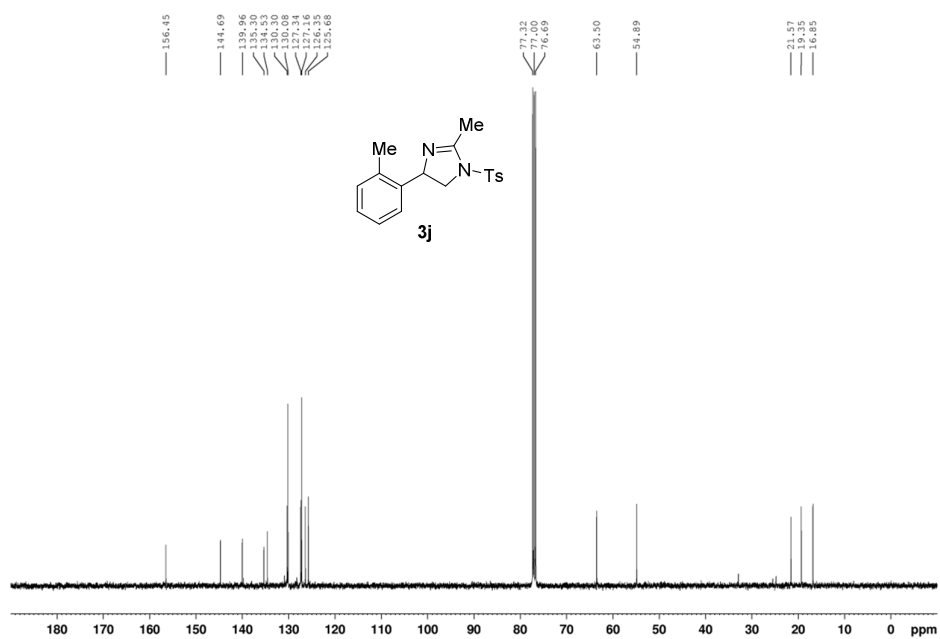

**4-(4-(tert-butyl)phenyl)-2-methyl-1-tosyl-4,5-dihydro-1H-imidazole (3k)**

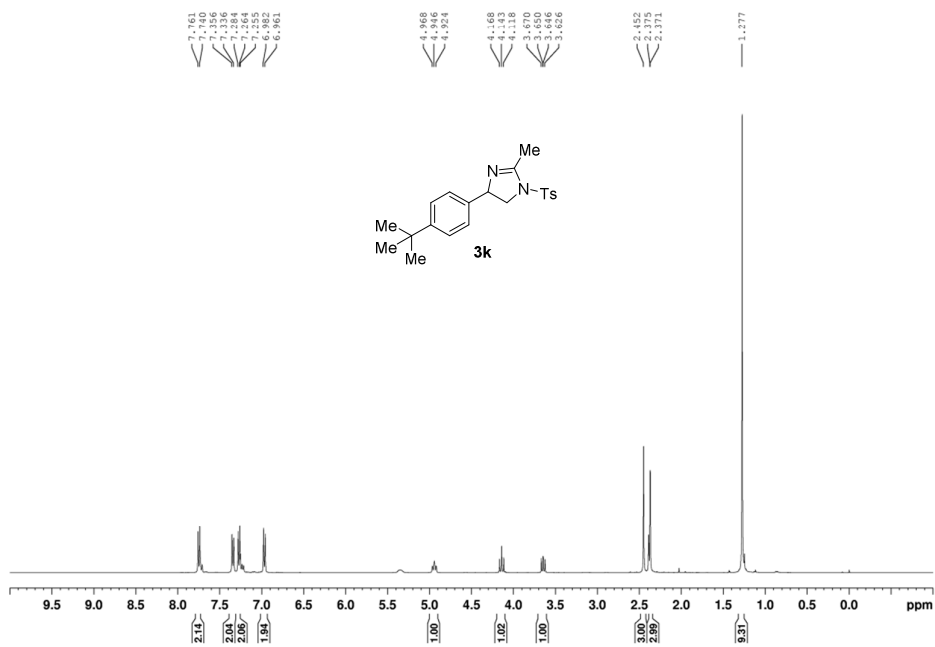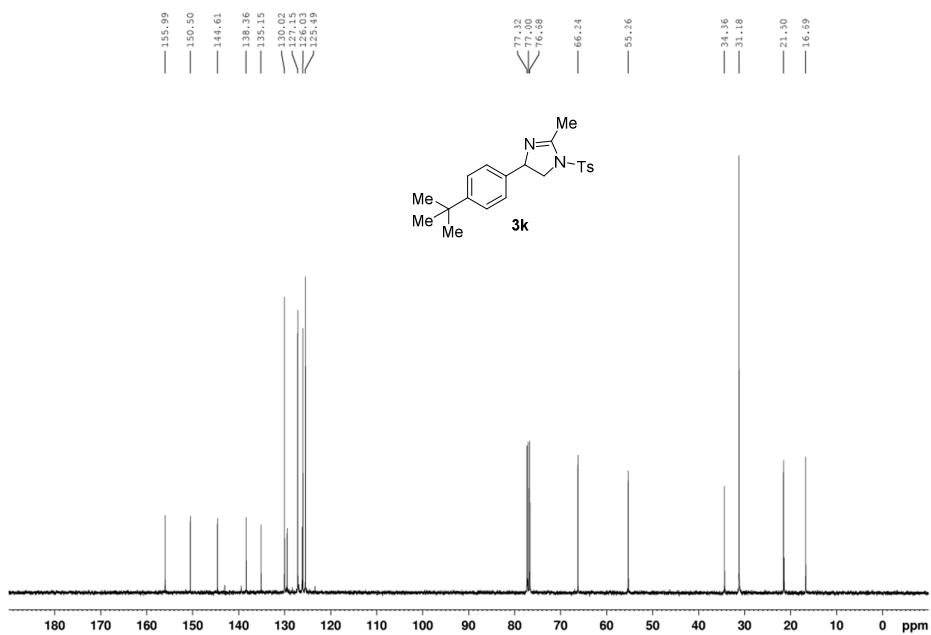



**2-methyl-1-tosyl-1,3a,8,8a-tetrahydroindeno[1,2-d]imidazole (3l)**

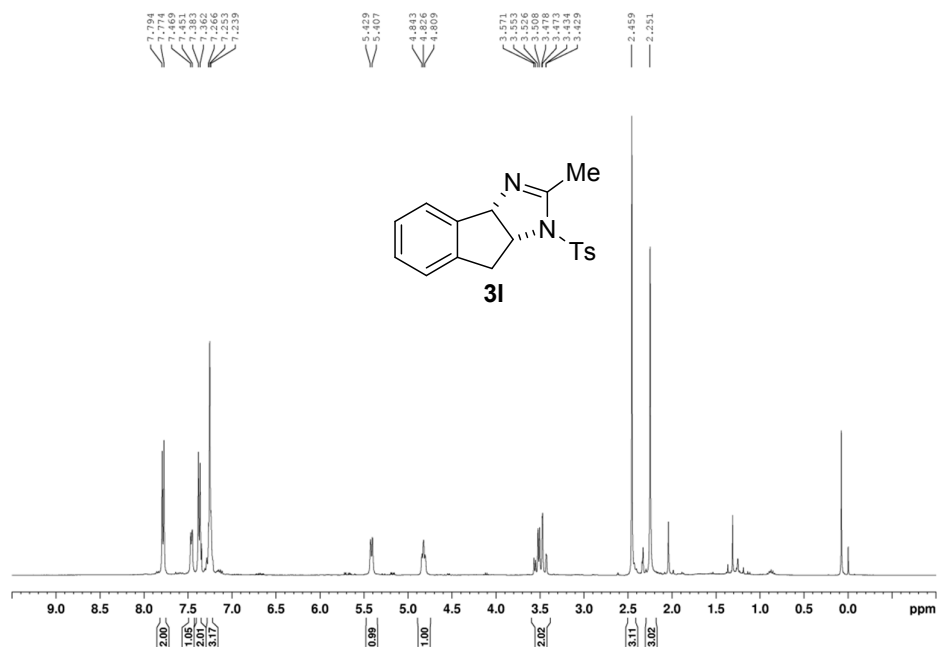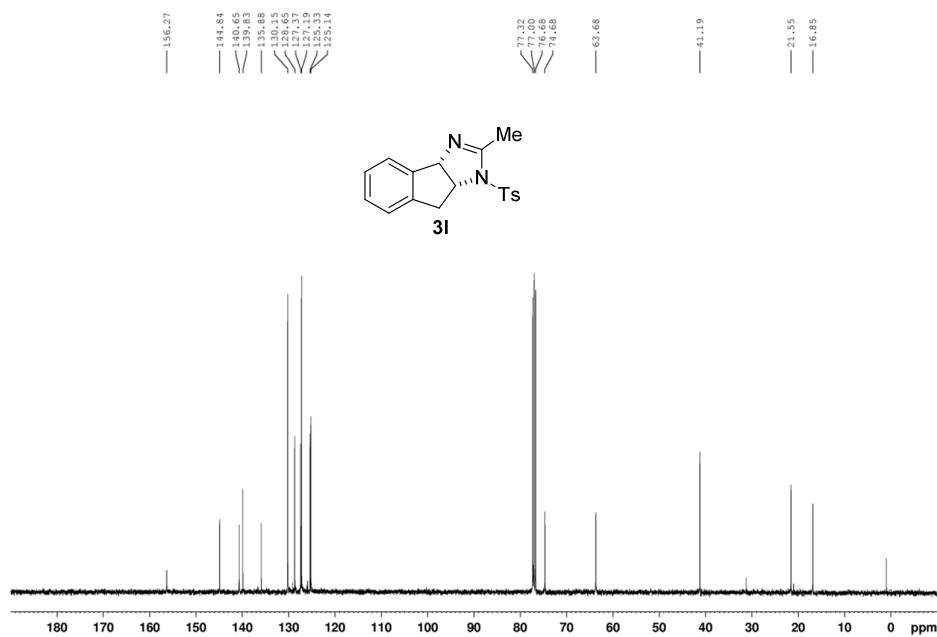

**2-methyl-3-tosyl-3a,4,5,9b-tetrahydro-3H-naphtho[1,2-d]imidazole (3m)**

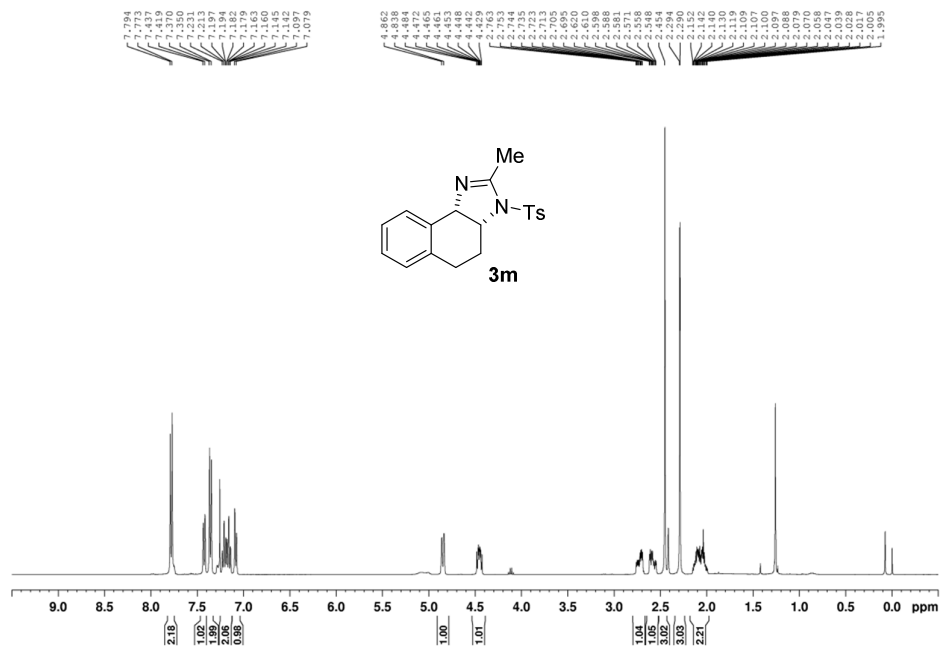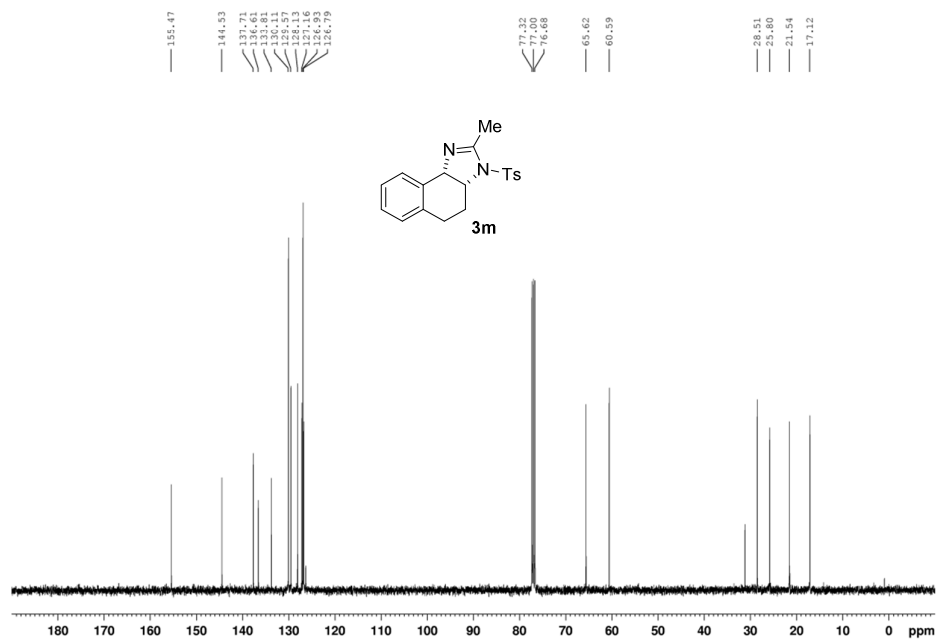

### 2,4-dimethyl-4-phenyl-1-tosyl-4,5-dihydro-1H-imidazole (3n)

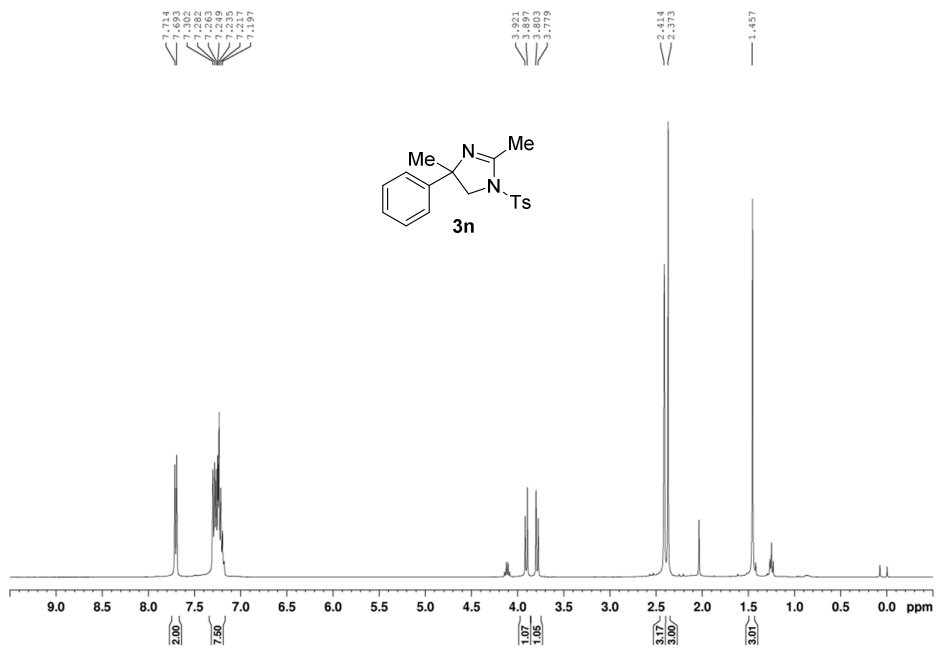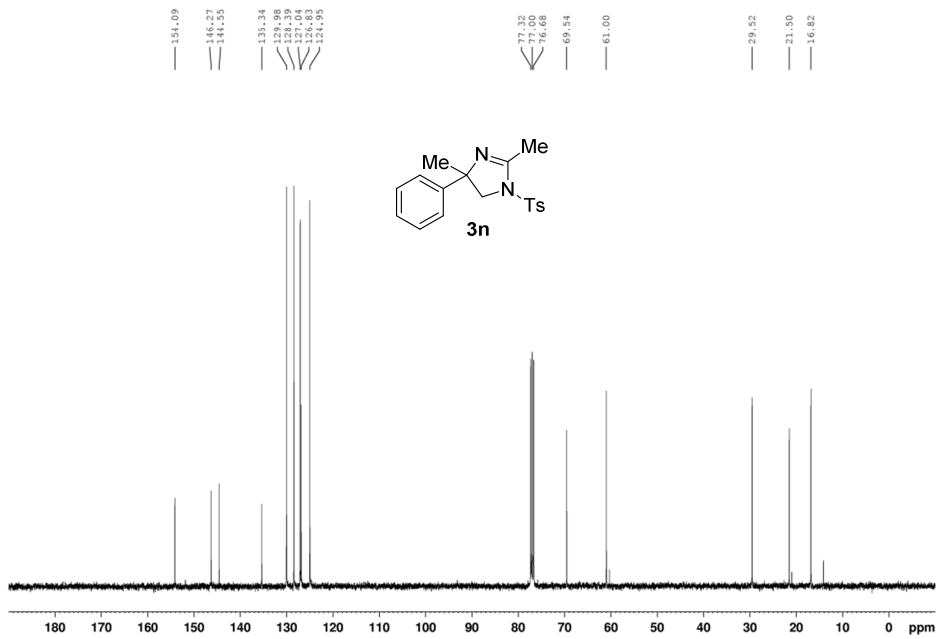

**4-(3-chlorophenyl)-2,4-dimethyl-1-tosyl-4,5-dihydro-1H-imidazole (3o)**

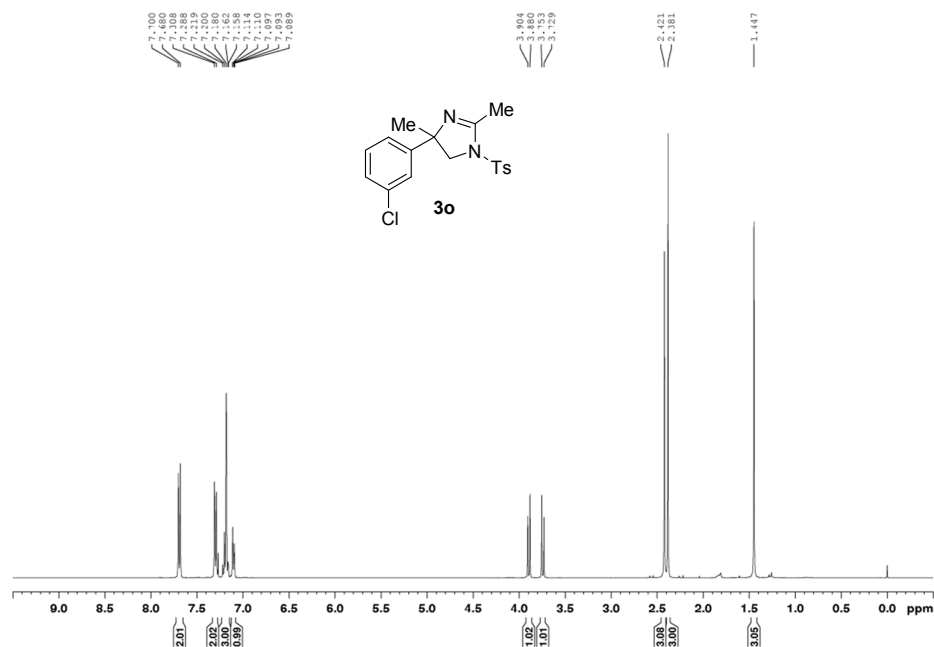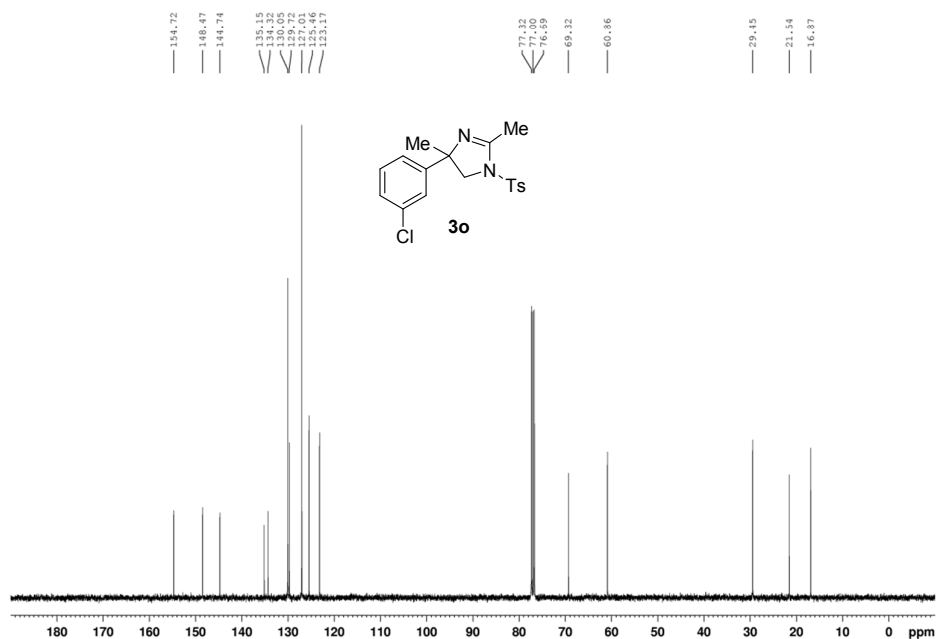

# 2-ethyl-4-phenyl-1-tosyl-4,5-dihydro-1H-imidazole (3p)

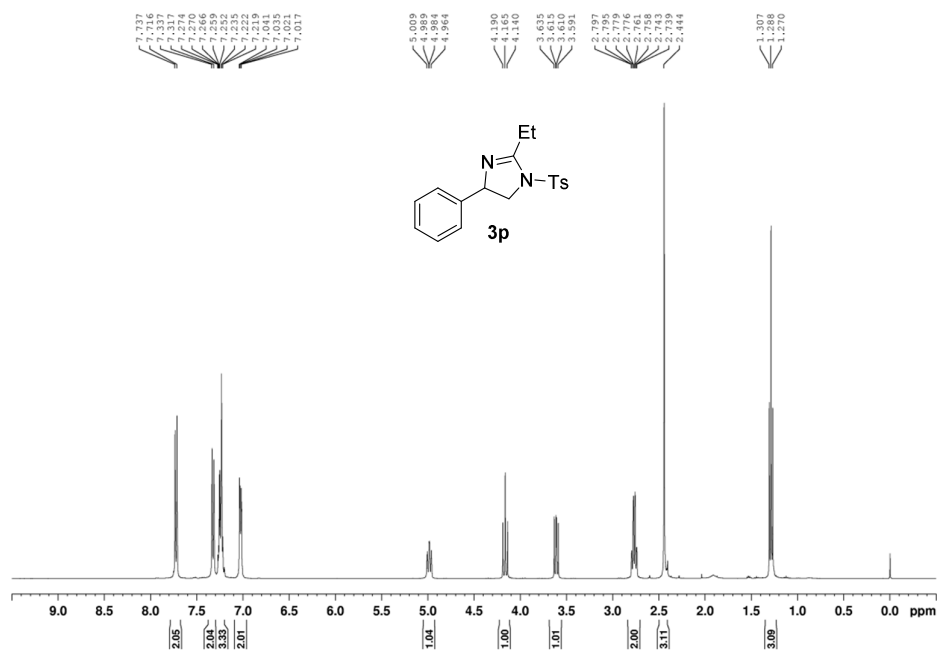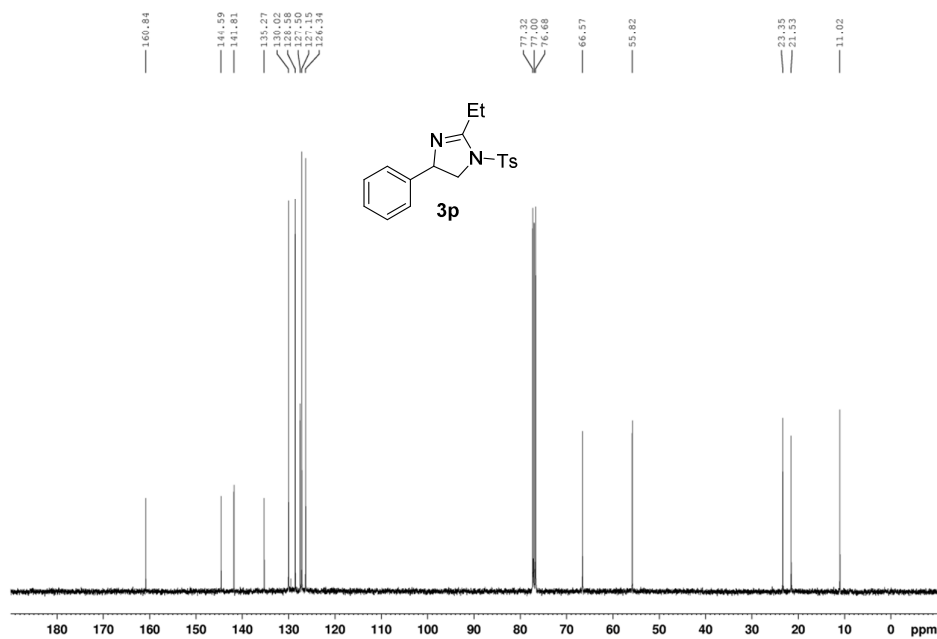

## 2-cyclopropyl-4-phenyl-1-tosyl-4,5-dihydro-1H-imidazole (3q)

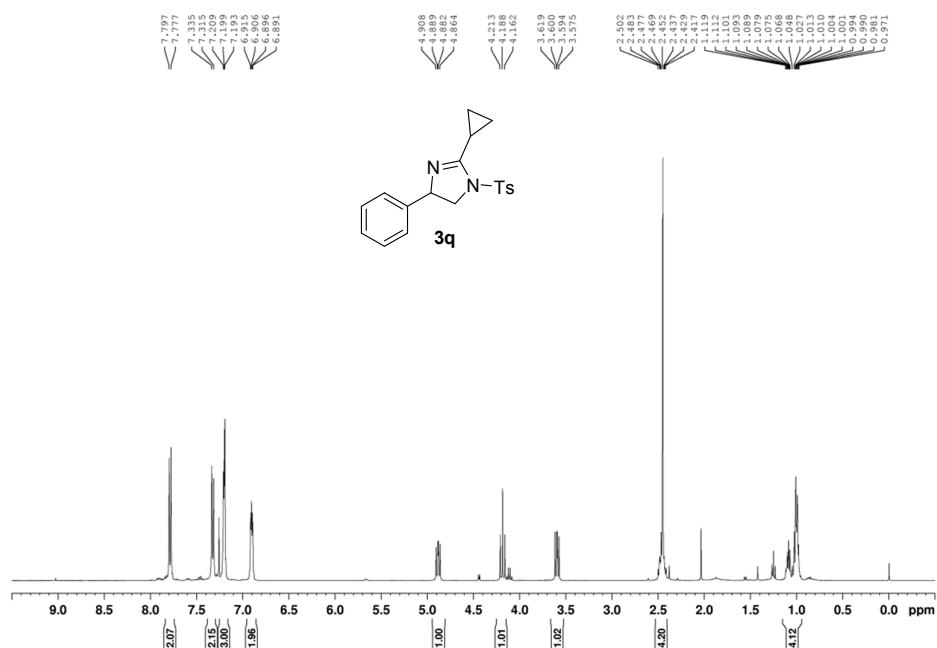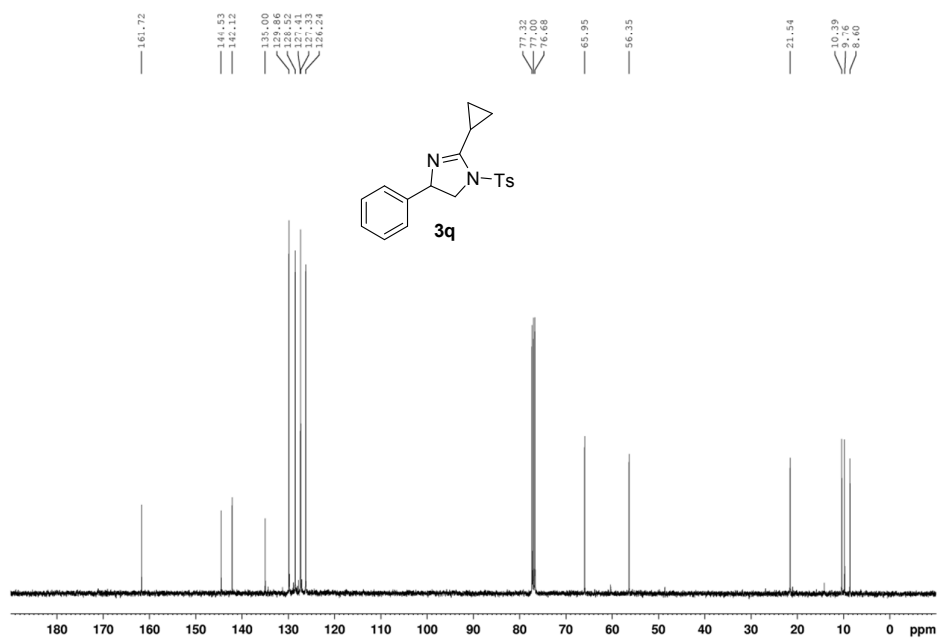

2,4-diphenyl-1-tosyl-4,5-dihydro-1H-imidazole (3r)

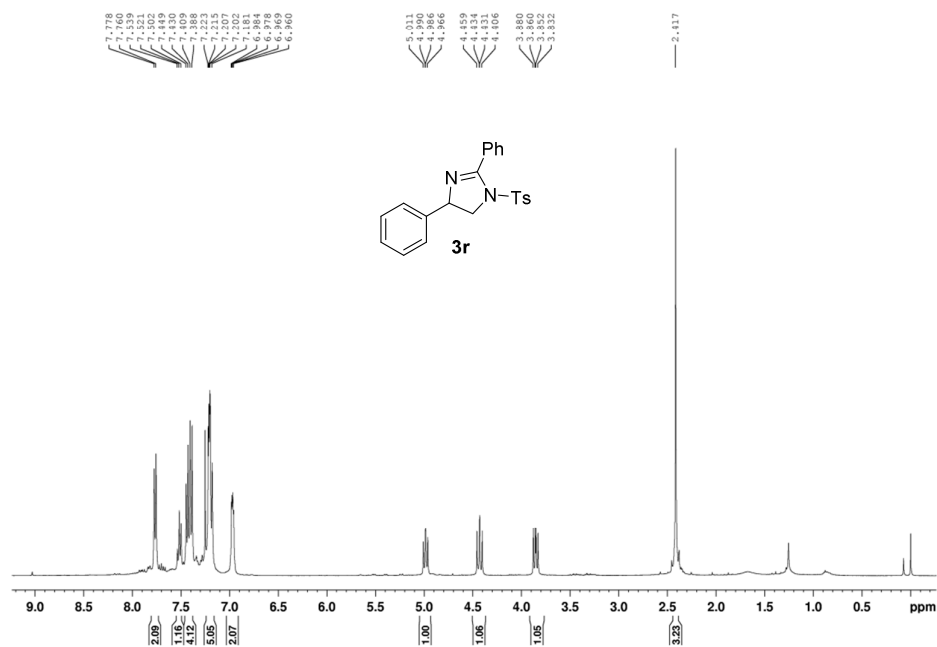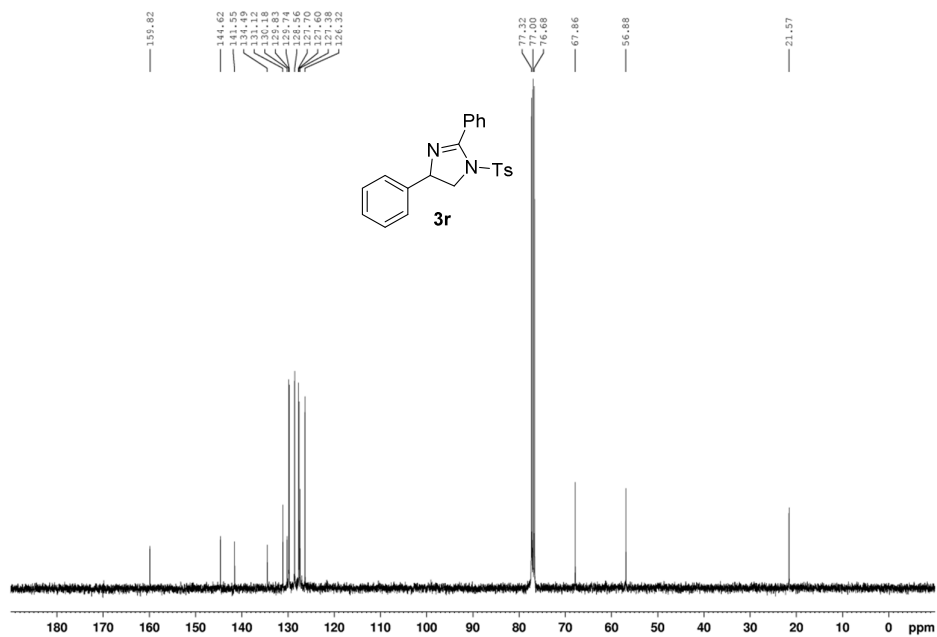

# 2,2-dimethyl-5-phenyl-3-tosyloxazolidine (**4a**)

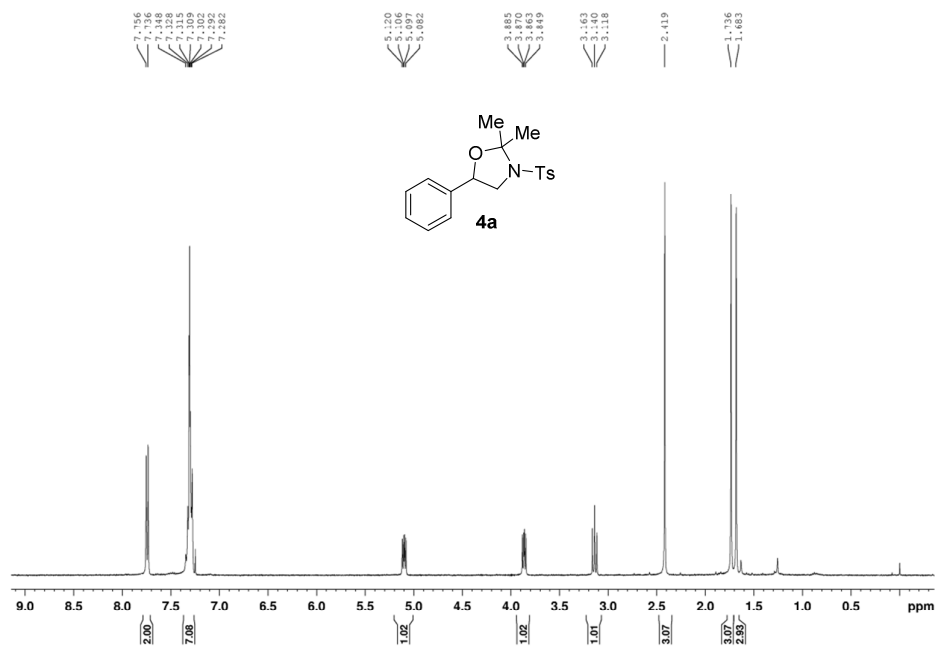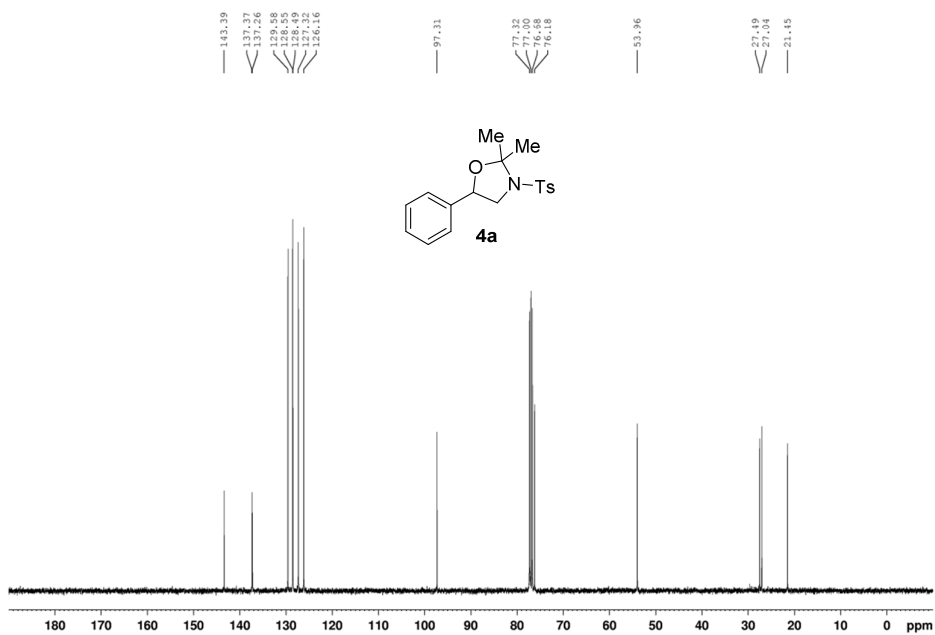



# 2,2-dimethyl-5-(p-tolyl)-3-tosyloxazolidine (4b)

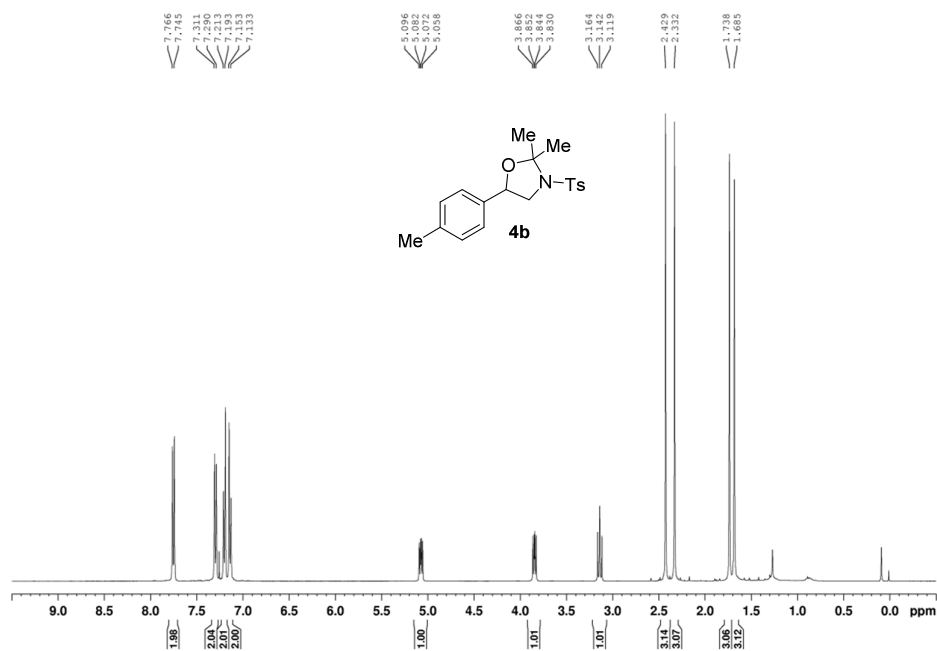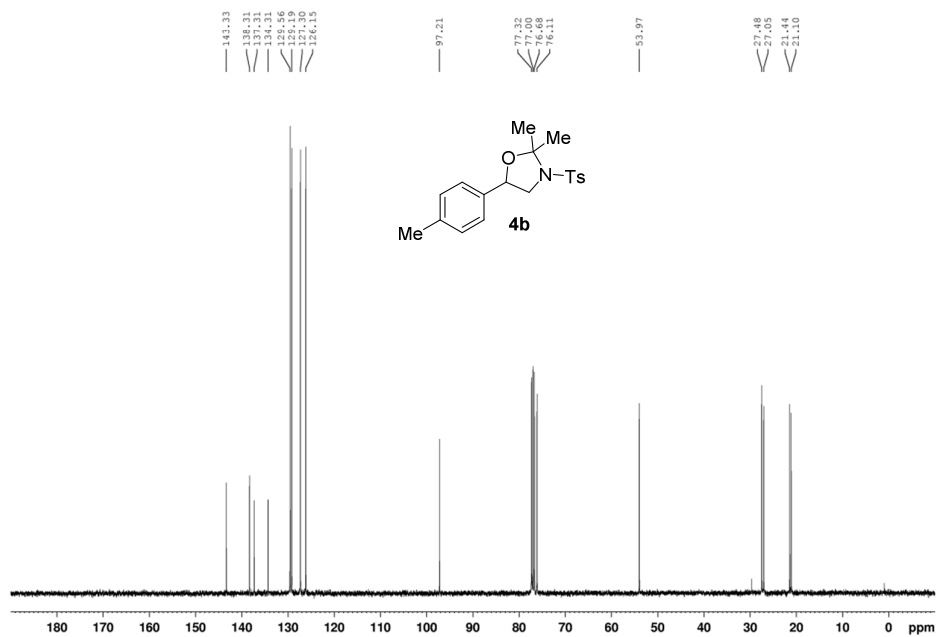

# **5-(4-isopropylphenyl)-2,2-dimethyl-3-tosyloxazolidine (4c)**

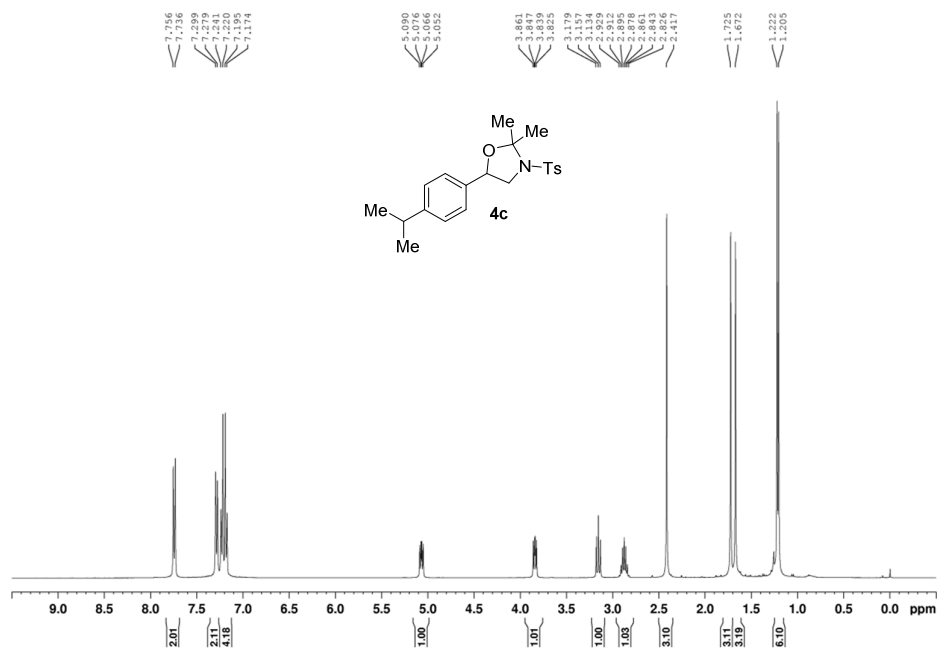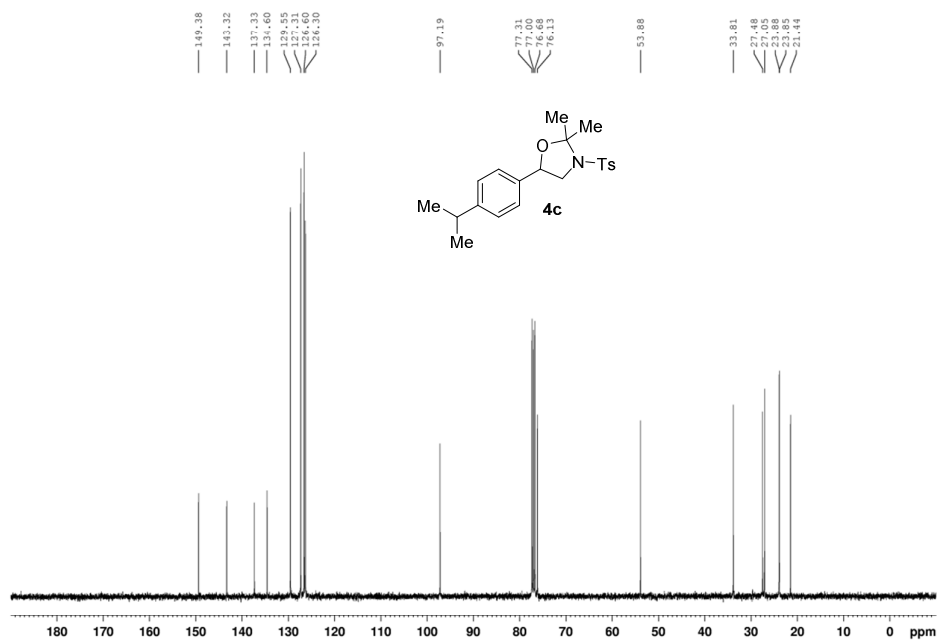

# **5-(4-(tert-butyl)phenyl)-2,2-dimethyl-3-tosyloxazolidine (4d)**

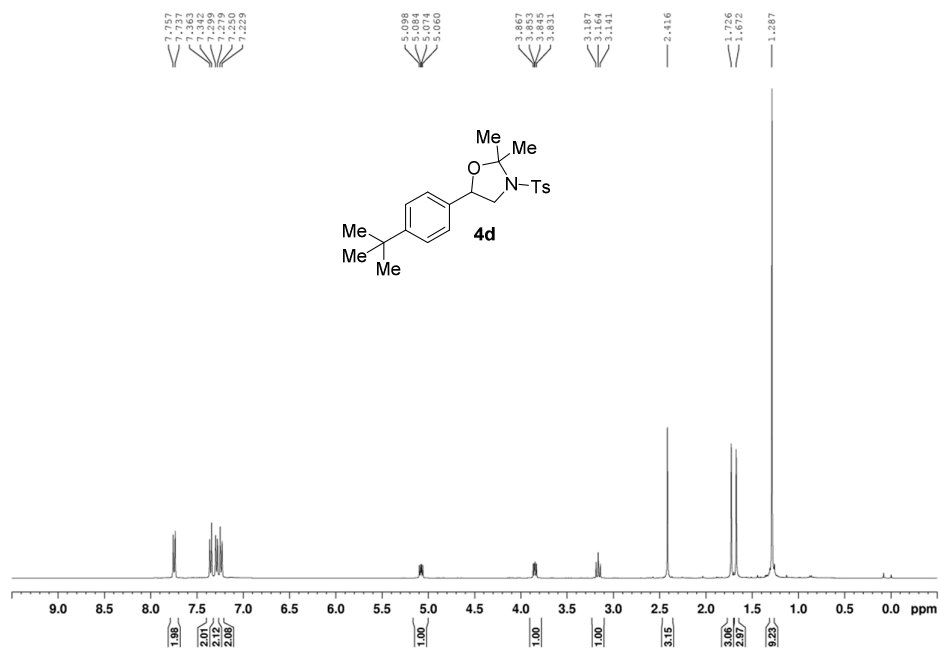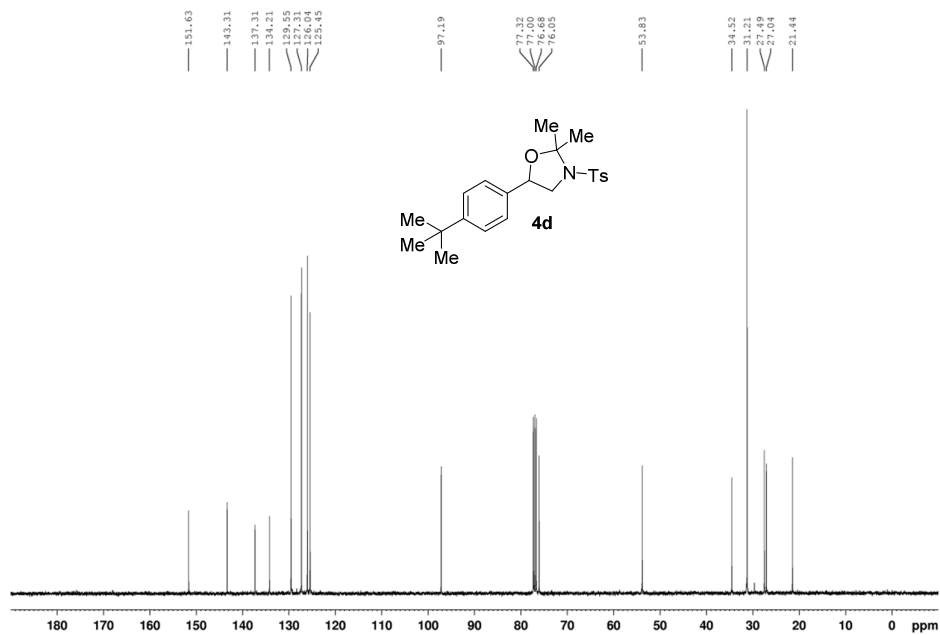

**5-(4-fluorophenyl)-2,2-dimethyl-3-tosyloxazolidine (4e)**

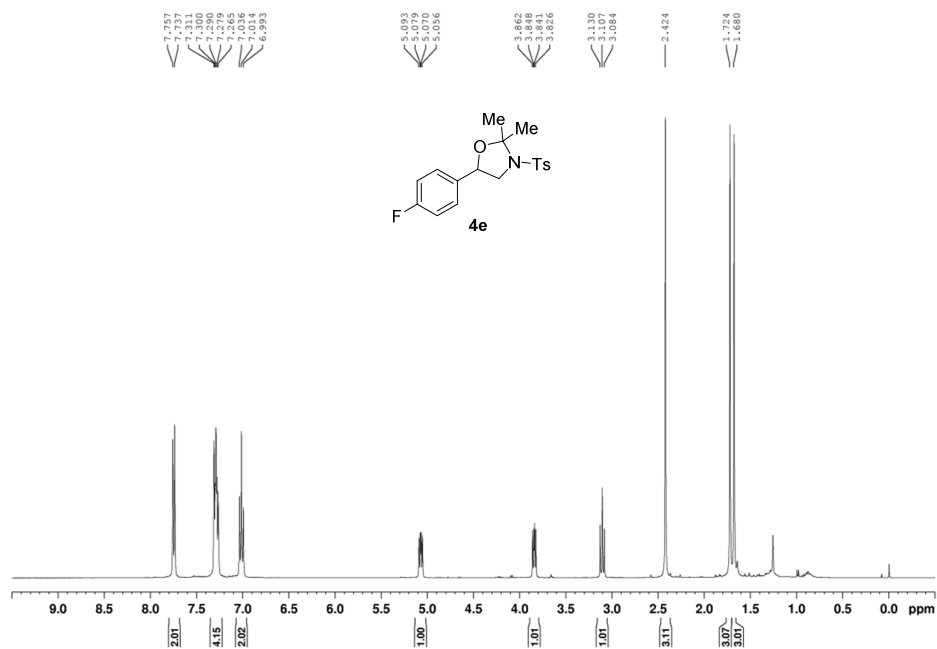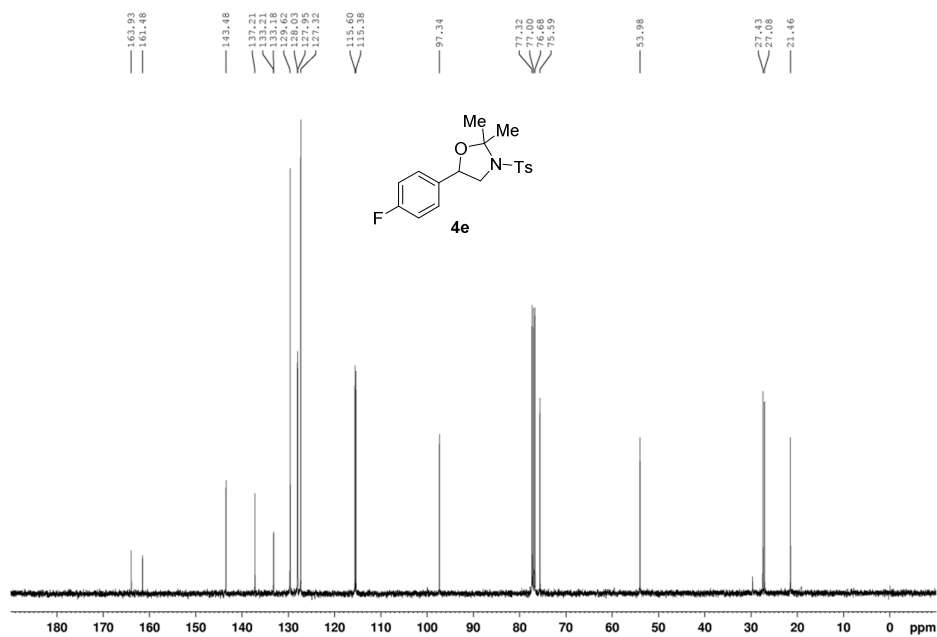

**5-(4-chlorophenyl)-2,2-dimethyl-3-tosyloxazolidine (4f)**

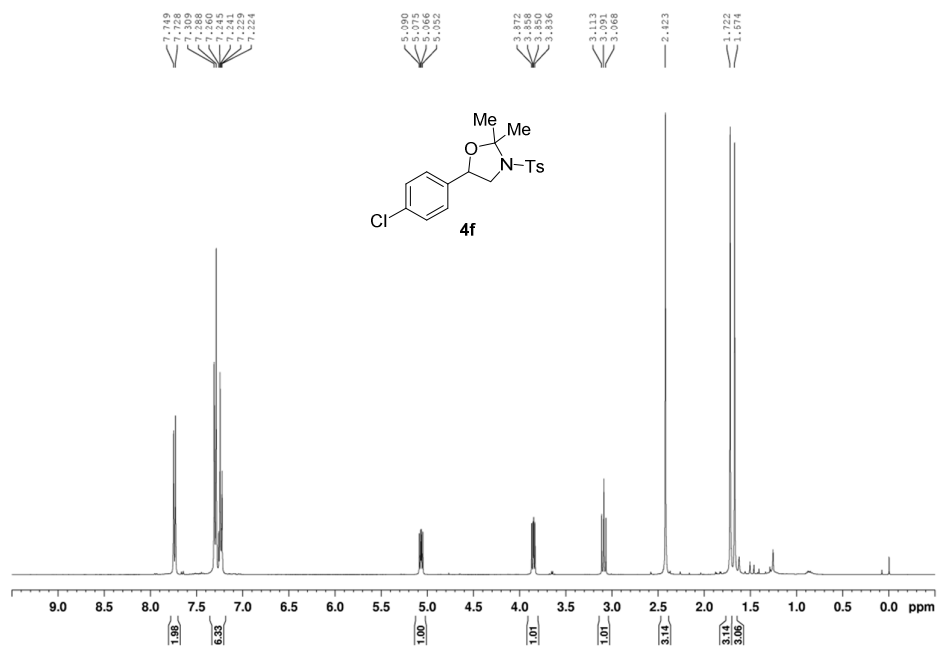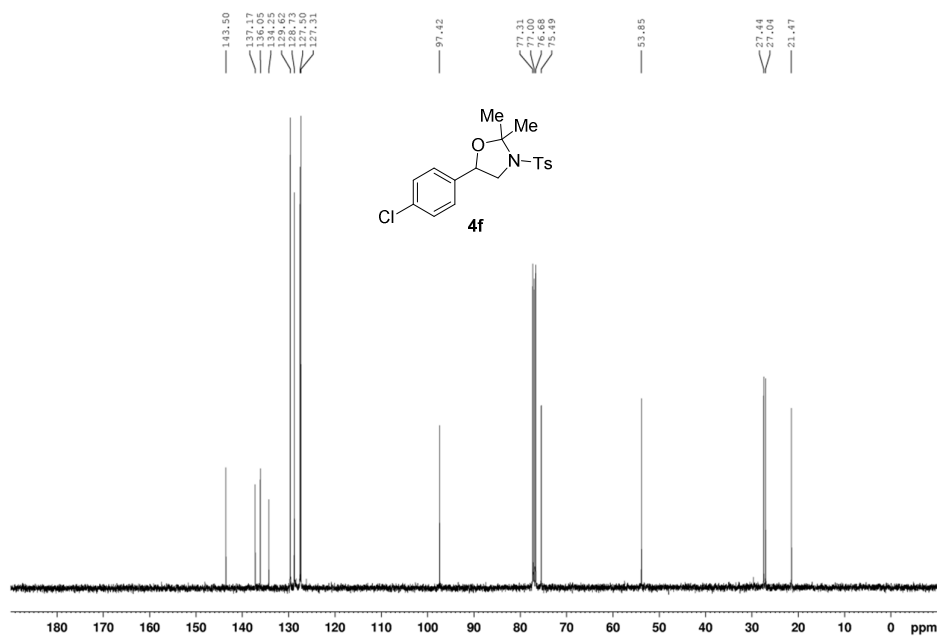

**5-(4-bromophenyl)-2,2-dimethyl-3-tosyloxazolidine (4g)**

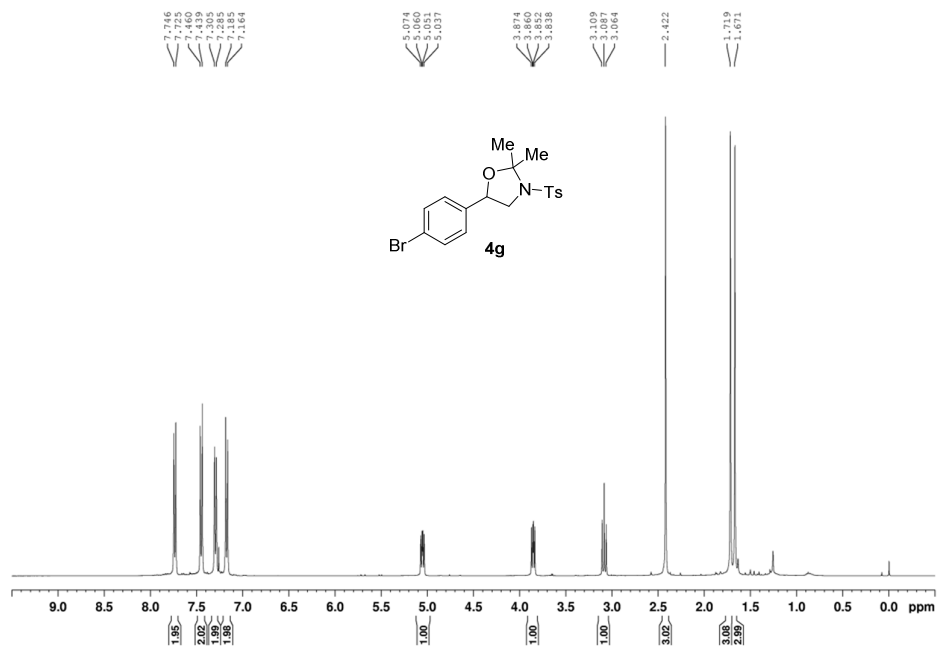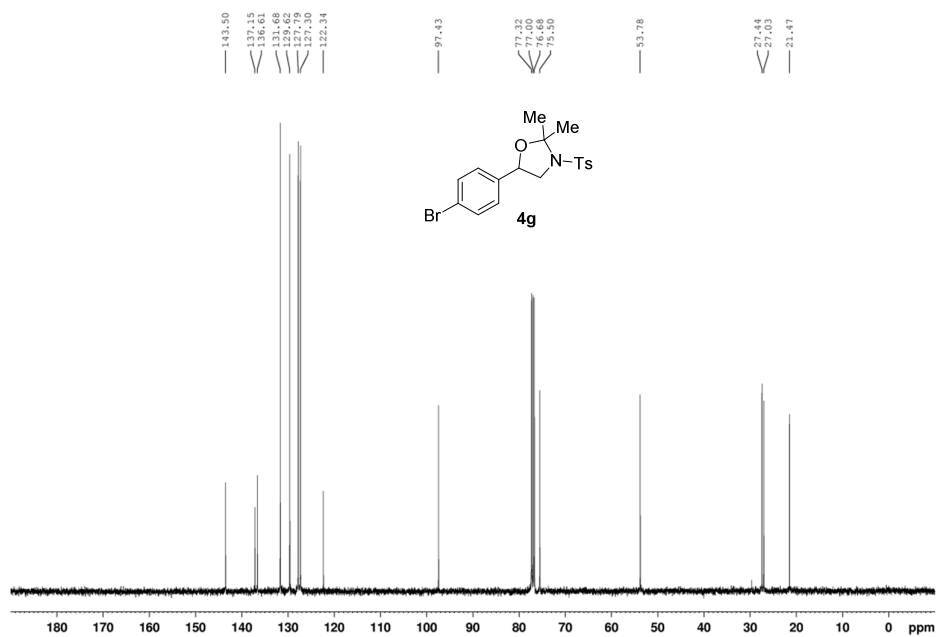

2,2-dimethyl-3-tosyl-3,3a,4,8b-tetrahydro-2H-indeno[2,1-d]oxazole (4h)

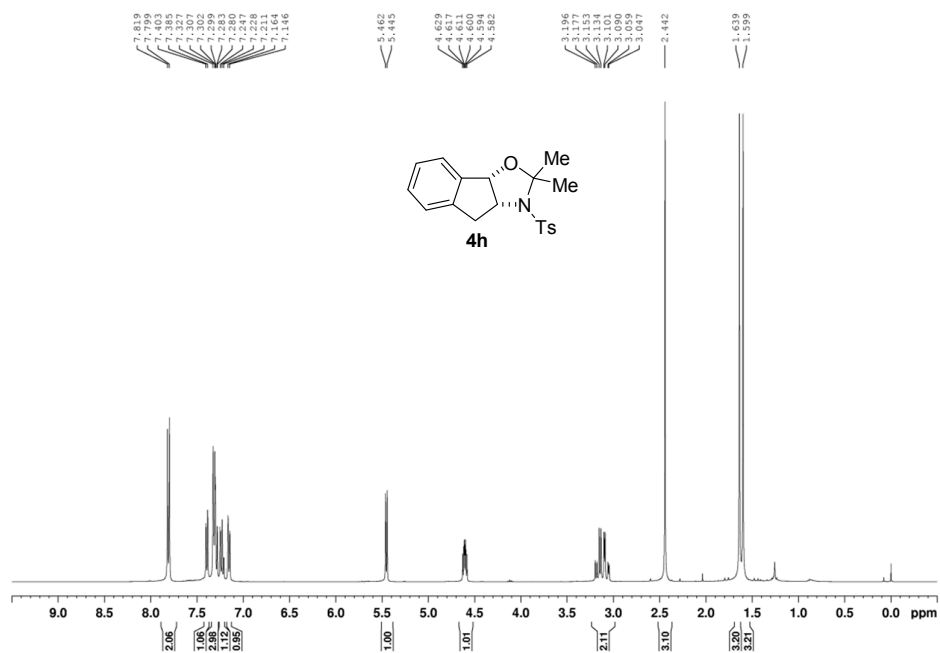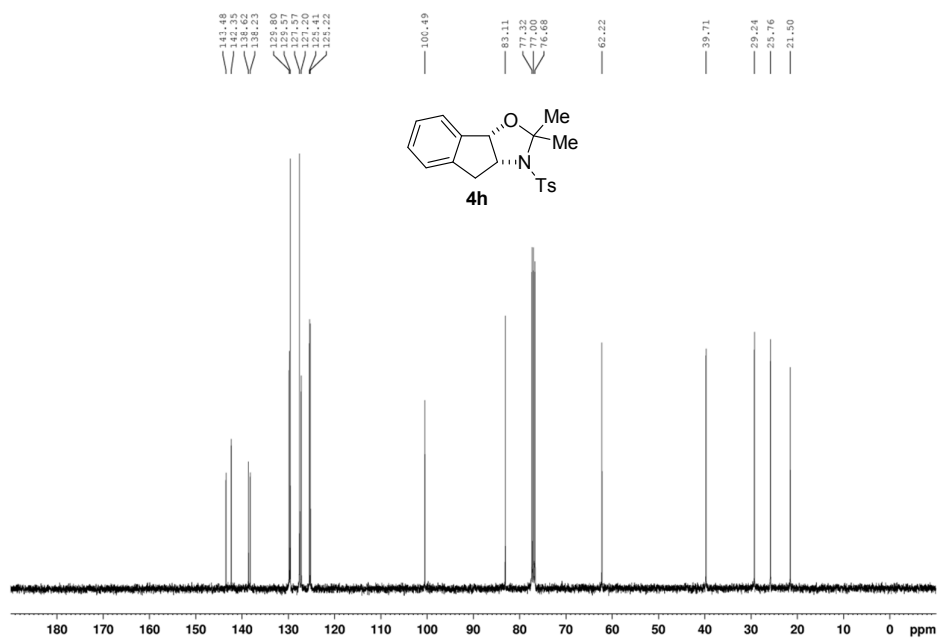

**2,2-dimethyl-3-tosyl-2,3,3a,4,5,9b-hexahydronaphtho[2,1-d]oxazole (4i)**

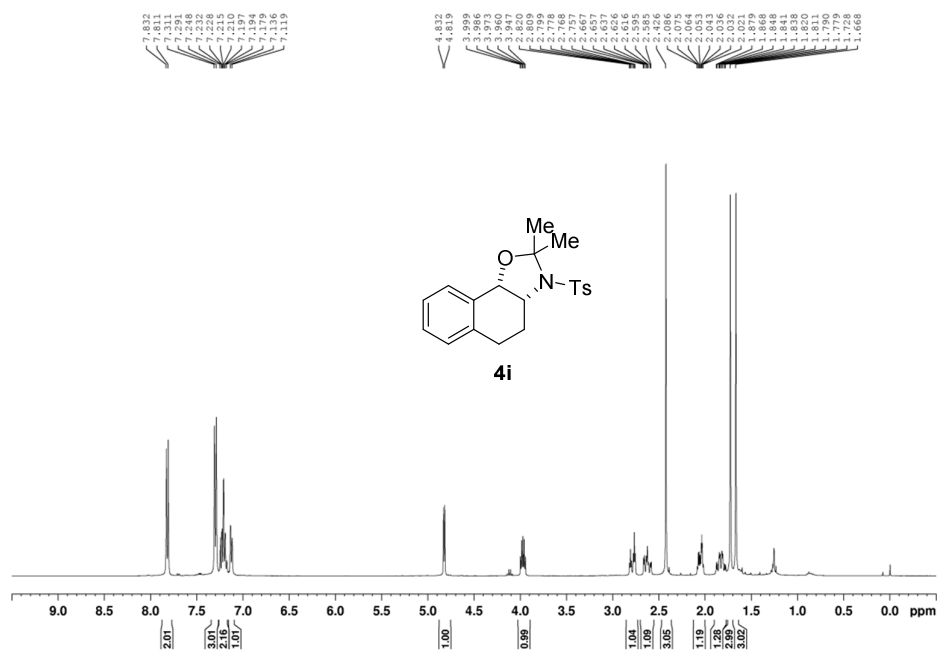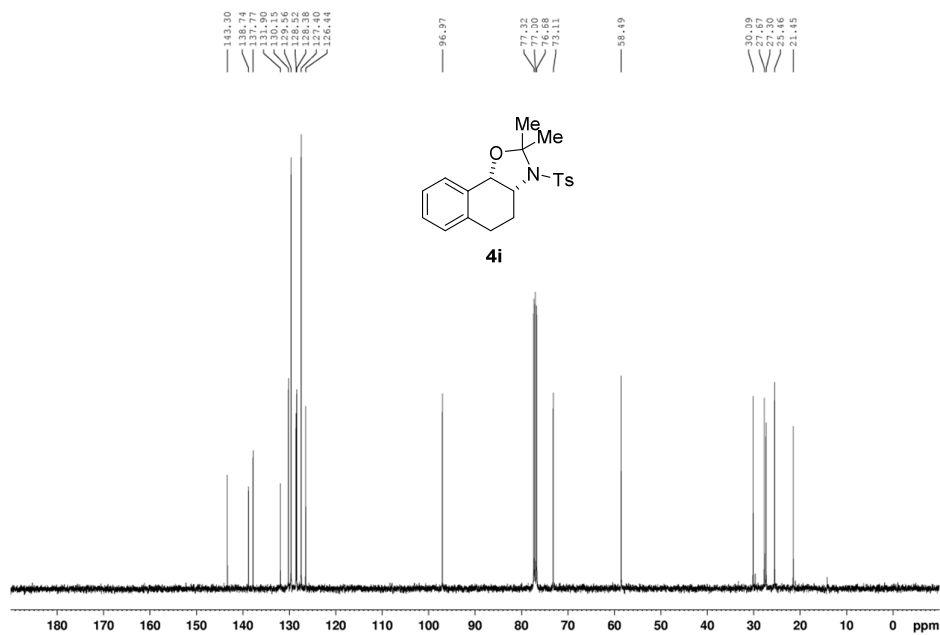



# 2,2,5-trimethyl-5-phenyl-3-tosyloxazolidine (**4j**)

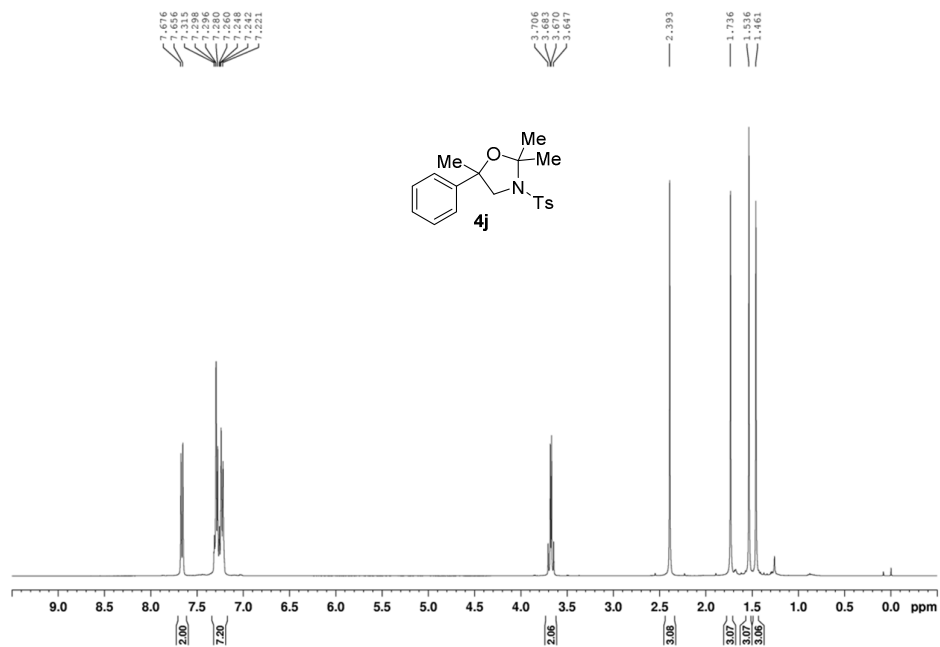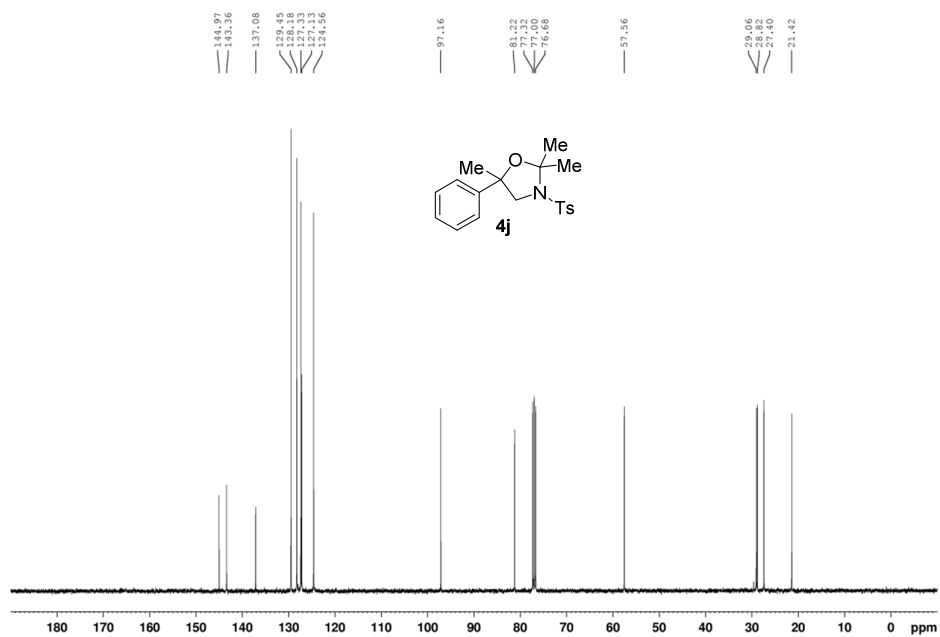

**5-(3-chlorophenyl)-2,2,5-trimethyl-3-tosyloxazolidine (4k)**

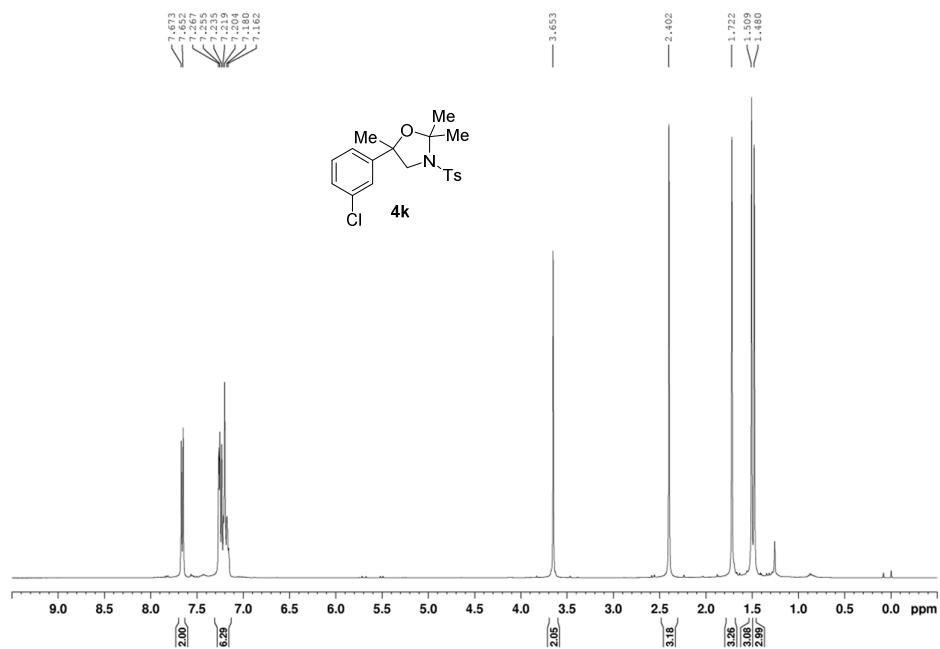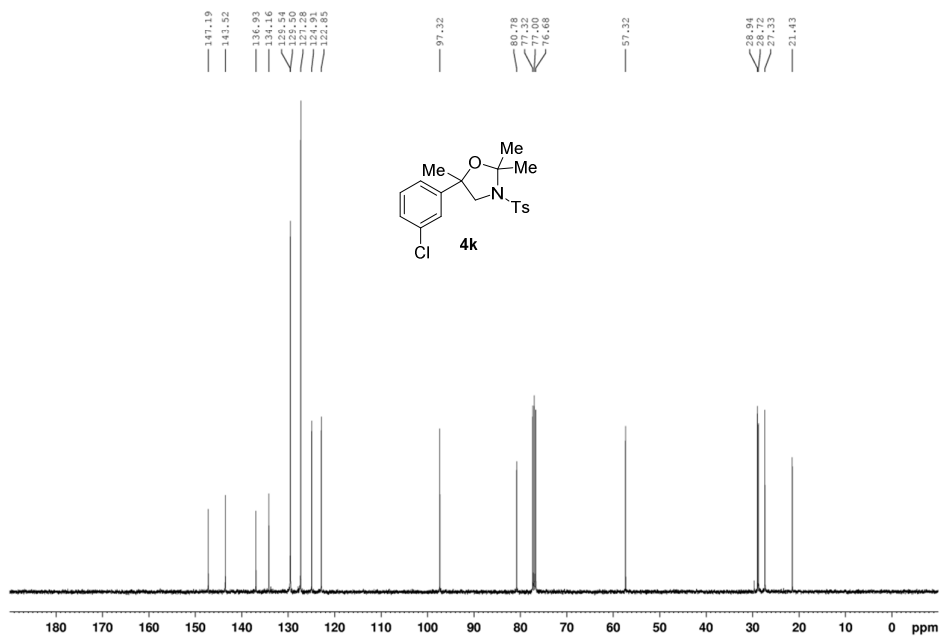

Supplement: Supplementary file 1 [file 7038089]
